# Supplementary material for: CNS-wide repopulation by hematopoietic-derived microglia-like cells corrects progranulin deficiency in mice
Source: PubMed Central journal article supplement (PMC11226701; doi:10.1038/s41467-024-49908-4), 2024-07-05
Supplement: 41467_2024_49908_MOESM1_ESM.pdf [file 41467_2024_49908_MOESM1_ESM.pdf]

# CNS-wide repopulation by hematopoietic-derived microglia-like cells corrects progranulin deficiency in mice

## Author list

Pasqualina Colella<sup>1\*</sup>, Ruhi Sayana<sup>1</sup>, Maria Valentina Suarez-Nieto<sup>1</sup>, Jolanda Sarno<sup>2,3</sup>, Kwamina Nyame<sup>4,5,6</sup>, Jian Xiong<sup>4,5,6</sup>, Luisa Natalia Pimentel Vera<sup>1</sup>, Jessica Arozqueta Basurto<sup>1</sup>, Marco Corbo<sup>7</sup>, Anay Limaye<sup>1,7</sup>, Kara L. Davis<sup>2</sup>, Monther Abu-Remaileh<sup>4,5,6</sup> Natalia Gomez-Ospina<sup>1\*</sup>.

## Affiliations

<sup>1</sup>Department of Pediatrics, Stanford University School of Medicine, Stanford, CA, 94305, USA.

<sup>2</sup>Hematology, Oncology, Stem Cell Transplant, and Regenerative Medicine, Department of Pediatrics, Stanford University, Stanford, CA, 94305, USA.

<sup>3</sup>Tettamanti Center, Fondazione IRCCS San Gerardo dei Tintori, 20900, Monza, Italy.

<sup>4</sup>Department of Chemical Engineering, Stanford University, Stanford, CA, 94305, USA.

<sup>5</sup>Department of Genetics, Stanford University, Stanford, CA, 94305, USA.

<sup>6</sup>The Institute for Chemistry, Engineering and Medicine for Human Health (Sarafan ChEM-H), Stanford University, Stanford, CA, 94305, USA.

<sup>7</sup>MedGenome, Inc, 348 Hatch Dr, Foster City, CA, 94404, USA.

\*Corresponding authors:

Pasqualina Colella, PhD [pcolella@stanford.edu](mailto:pcolella@stanford.edu)

Natalia Gomez-Ospina MD, PhD: [gomezosp@stanford.edu](mailto:gomezosp@stanford.edu)

## Table of contents

|                               |    |
|-------------------------------|----|
| Supplementary Figure 1 .....  | 1  |
| Supplementary Figure 2 .....  | 3  |
| Supplementary Figure 3 .....  | 4  |
| Supplementary Figure 4 .....  | 5  |
| Supplementary Figure 5 .....  | 6  |
| Supplementary Figure 6 .....  | 7  |
| Supplementary Figure 7 .....  | 9  |
| Supplementary Figure 8 .....  | 10 |
| Supplementary Figure 9 .....  | 11 |
| Supplementary Figure 10 ..... | 13 |
| Supplementary Figure 11.....  | 15 |
| Supplementary Figure 12 ..... | 16 |
| Supplementary Figure 13 ..... | 18 |
| Supplementary Figure 14.....  | 19 |
| Supplementary Figure 15 ..... | 20 |
| Supplementary Figure 16.....  | 21 |
| Supplementary Figure 17.....  | 22 |
| Supplementary Table 1.....    | 23 |
| Supplementary Table 2 .....   | 24 |
| Supplementary Table 3 .....   | 25 |

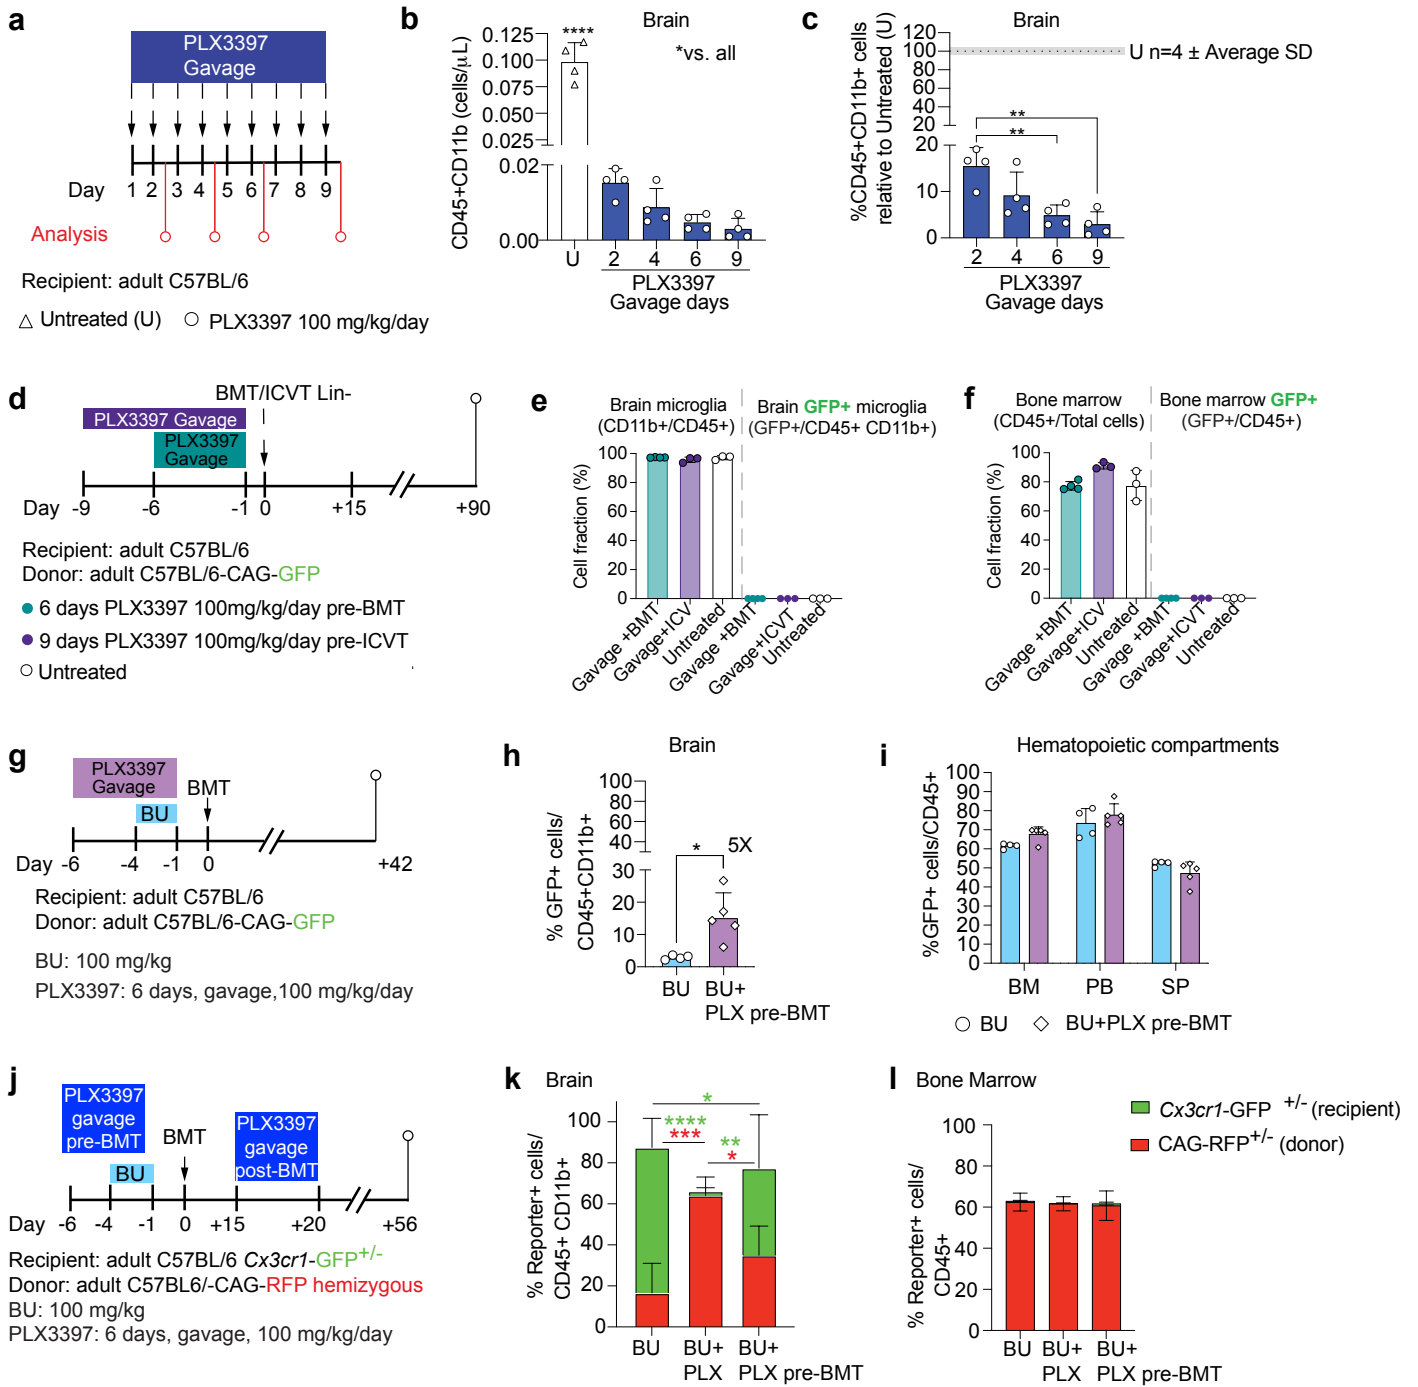

## Supplementary Figure 1. Optimization of a PLX3397 conditioning regimen for microglia depletion and replacement.

**a-c** Analyses of microglia depletion in the brain of adult C57BL/6 mice conditioned with PLX3397 (PLX) by oral gavage for 2, 4, 6, or 9 consecutive days at 100 mg/kg/day (n = 4 mice/cohort). Untreated age- and sex-matched mice were used as control (U, n = 4 mice/cohort). **a** Experimental timeline showing the PLX dosing and time points of analysis. **b-c** Absolute count of CD45+CD11b+ cells in the brain measured by flow cytometry and expressed as either absolute values (**b**), or percentages relative to Untreated mice (**c**, U = 100%, grey line). \*p-value vs Untreated mice (U). **d-i** Analysis of donor cell engraftment in brain and hematopoietic compartments of adult C57BL/6 mice treated with the optimized PLX regimen and receiving either intravenous bone marrow transplant (BMT) or intracerebroventricular transplant (ICVT) of Lineage negative (Lin-) bone marrow cells, isolated from homozygous C57BL/6-CAG-GFP mice. **d** Experimental timeline. Untreated: age- and sex-matched control mice. PLX was administered by oral gavage (100 mg/kg/day for 6 or 9 days). **e-f** Analysis of donor chimerism in measured by flow cytometry in the brain (**e**) and bone marrow (**f**) at study end. The left panels show the relative frequency of CD11b+/CD45+ cells in the brain (**e**) and CD45+ hematopoietic cells in the bone marrow (**f**) at the same time point. Mouse numbers (n): BMT n = 4, ICV Lin- n = 3, Untreated n = 3. **g** Experimental timeline showing the myeloablation of C57BL/6 mice with busulfan (BU, 100 mg/kg) and 6-day PLX conditioning (600 mg/kg, 100 mg/kg/day) before BMT (pre-BMT). Follow-up was 1.5 months after BMT. **h-i** Fraction of transplant-derived GFP+ CD45+CD11b+ cells measured by flow cytometry at study end in brain (**h**) and hematopoietic compartments [**i**, bone marrow (BM), peripheral blood (PB), and spleen (SP)]. BU n=4, BU + PLX pre-BMT n=5. **j-l** Analysis of donor chimerism in brain and bone marrow of adult *Cx3cr1*-GFP<sup>+/-</sup> mice conditioned with BU, or BU+ PLX. PLX was given either pre- or post-BMT. Whole bone marrow was isolated from adult C57BL/6-CAG-RFP hemizygous mice. **j** Experimental timeline. Follow-up was 2 months after BMT. **k-l** Fraction of transplant-derived RFP+ and recipient *Cx3cr1*-GFP<sup>+/-</sup> cells measured in the brain (**k**) and bone marrow (**l**) by flow cytometry. BU n = 4, BU + PLX n = 4, BU + PLX pre-BMT n = 3. **a-l** Data are reported as Mean ± SD. Source data are provided as a Source Data file. Statistical analysis: \*p < 0.05, \*\*p < 0.01, \*\*\*p < 0.001, \*\*\*\*p < 0.0001, the exact p-values of all comparisons are reported in the Source Data file; **b-c** One-way ANOVA with Tukey post-hoc; **h** Two-tailed unpaired t-test; **i, k-l** Two-way ANOVA with Tukey post-hoc. **k** The green asterisks show statistically significant differences in the fraction of recipient *Cx3cr1*-GFP+ cells between the indicated groups; the red asterisks show statistically significant differences in the fraction of BMT-derived RFP+ cells between the indicated groups.

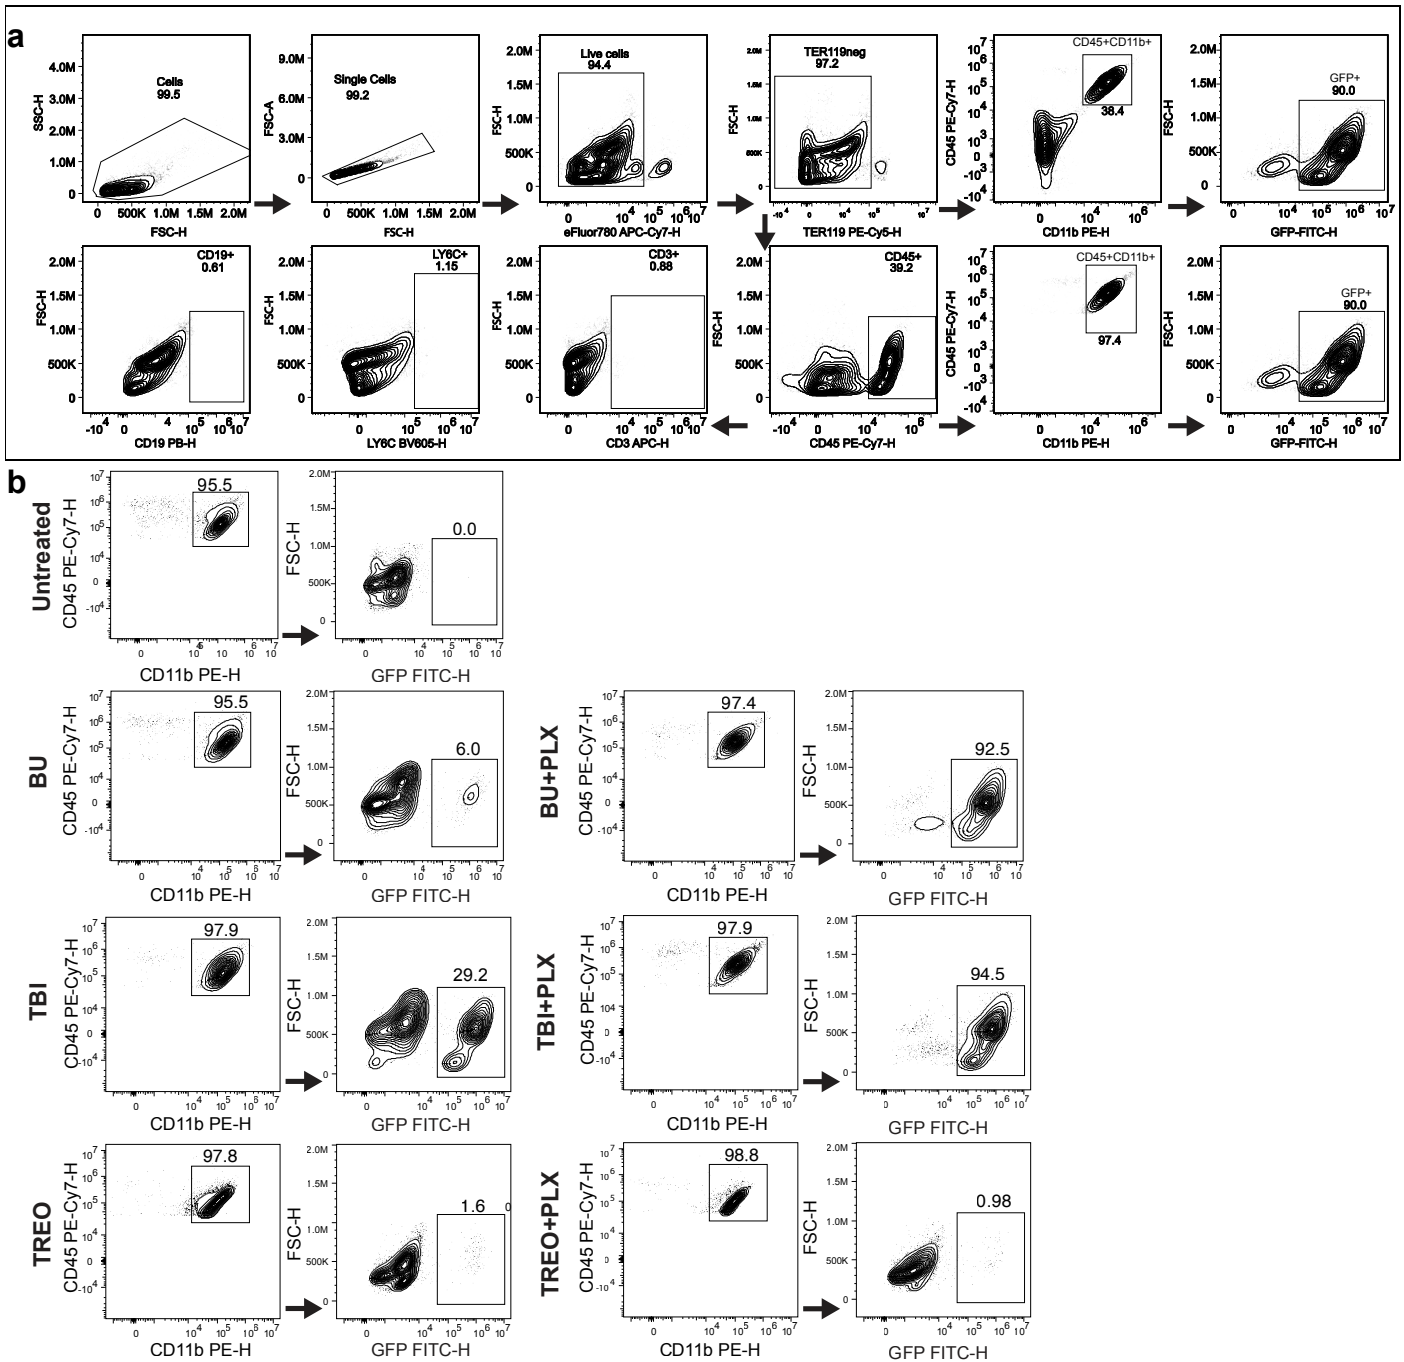

### Supplementary Figure 2. Gating strategy and analysis of brain donor chimerism.

**a** Representative gating strategy of cells isolated from the brain and analyzed by flow cytometry. The representative flow plots depict the gating strategy to get the percentage of transplant-derived GFP<sup>+</sup> cells measured in the brain of an adult C57BL/6 mouse transplanted with total bone marrow from C57BL/6-CAG-GFP mice and conditioned as depicted in **Fig. 1a**. The gating strategy to quantify pro-inflammatory hematopoietic cells infiltrated in the brain is also depicted (Ly6C<sup>+</sup> cells, CD19<sup>+</sup> B cells and CD3<sup>+</sup> T cells, data depicted in **Fig. 1f**). The time point of the depicted analyses is 7 months after bone marrow transplant. **b** Representative flow plots relative to **Fig. 1 a-b**. The plots depict the percentage of transplant-derived GFP<sup>+</sup> cells measured in the brain of adult C57BL/6 mice transplanted with total bone marrow from C57BL/6-CAG-GFP mice and conditioned with either total body irradiation (TBI) +/- PLX3397, busulfan (BU) +/- PLX3397 or treosulfan (TREO) +/- PLX3397, one mouse/cohort is depicted. The time point of the analyses is three months after bone marrow transplant.



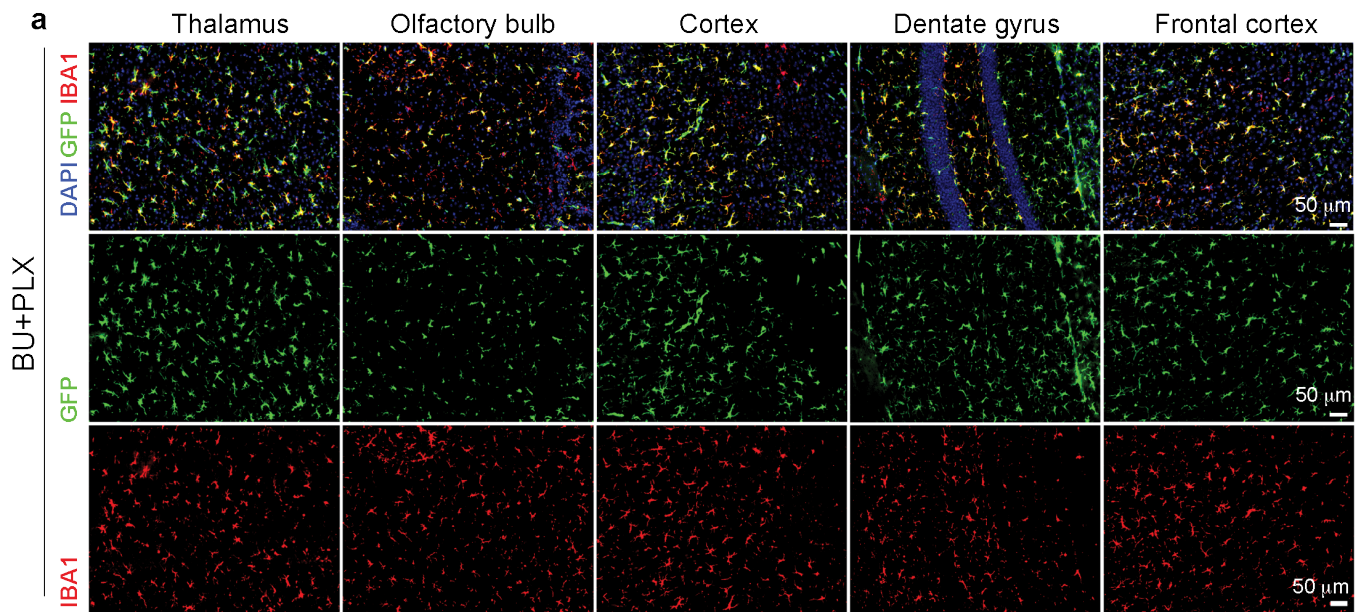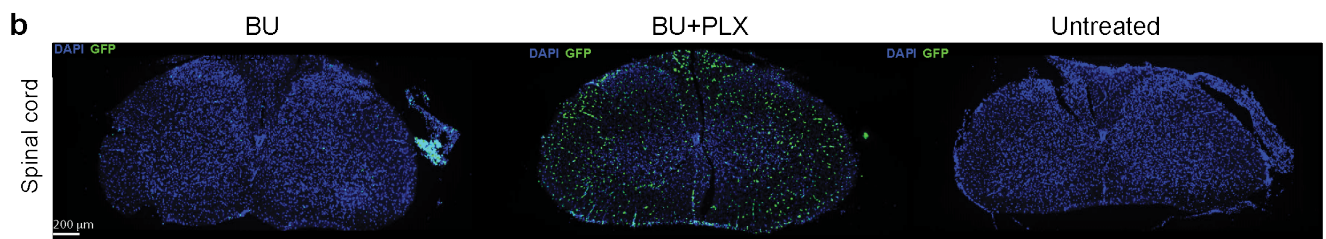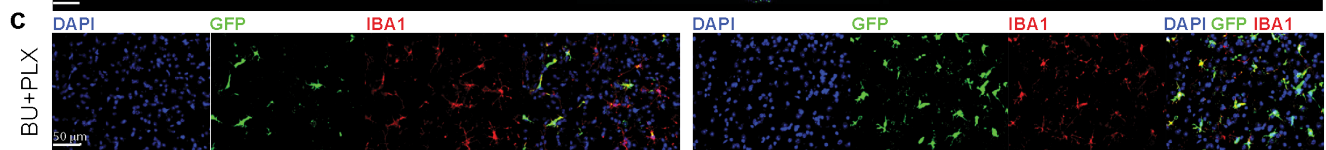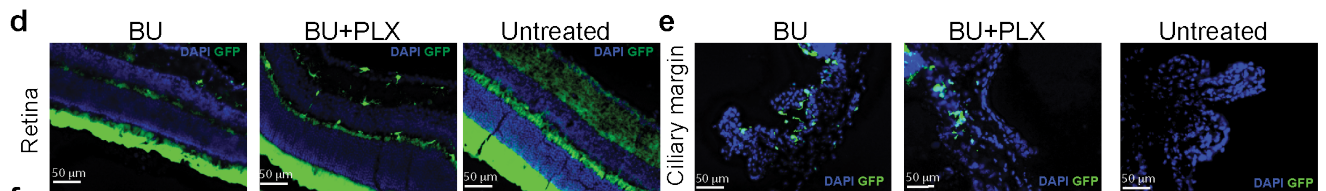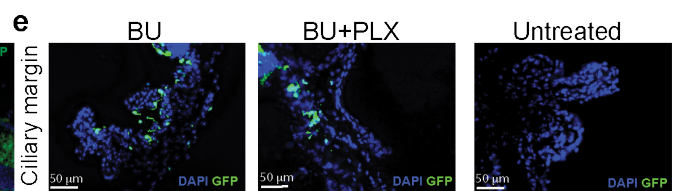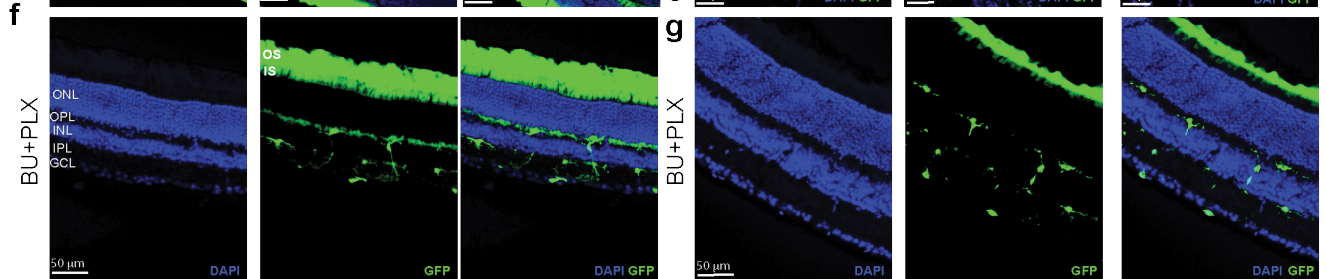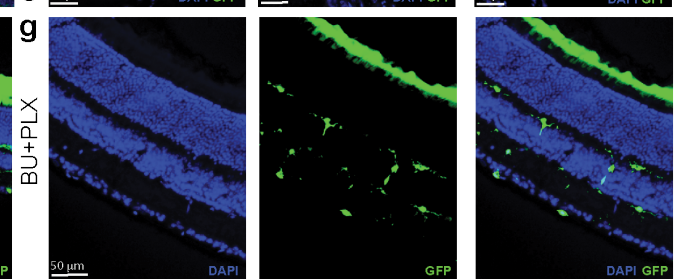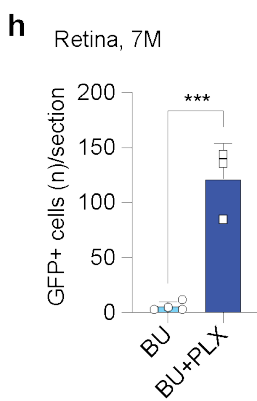

**Supplementary Figure 3. Efficient microglia replacement in the brain, spinal cord, and retina of mice conditioned with busulfan and six-day PLX3397 conditioning.**

**a-f** Representative histological images of the brain (**a**) spinal cord (**b-c**) and retina (**d-g**) of adult C57BL/6 mice conditioned with busulfan (BU) or BU + PLX3397 (PLX), 7 months after total bone marrow transplant (BMT) from adult C57BL/6-CAG-GFP mice and conditioned as depicted in **Fig. 1a**; age-matched, untreated mice were used as GFP negative controls. **a-g** The natural GFP fluorescence of transplant-derived cells is depicted. The scale bars are depicted. **a, c** Representative images of ionized calcium-binding adapter molecule 1 (IBA1) immunostaining of the brain and spinal cord. The myeloid-microglia marker IBA1 stained transplant-derived GFP+ MGCLs and, GFP-negative host MG. **a-c** Images are representative of n = 4 mice/group. **d-h** Engraftment of transplant-derived GFP+ cells in the retina. **d-e** In mice treated with BU, transplant-derived GFP+ cells were mostly found in the ciliary margin (CM), with very few cells integrated into the neuroretina. **f-g** In BU + PLX-treated mice the GFP+ cells integrated into the neuroretina occupying the physiological microglia niches [inner and outer plexiform layer (IPL and OPL, respectively)], ciliary margin and, to a lesser extent, ganglion cell layer (GCL) with no disruption of the photoreceptor outer nuclear layer (ONL); OS: outer segments; IS: inner segments. **h** Quantification of GFP+ cells (n)/retinal section in mice treated with BU and BU + PLX. Representative images (**d-g**) and quantification (**h**) derive from BU n = 4 mice and BU + PLX n=3 mice. Data are reported as Mean  $\pm$  SD. Source data are provided as a Source Data file. Statistical analysis: two-tailed unpaired t-test, p=0.0007.

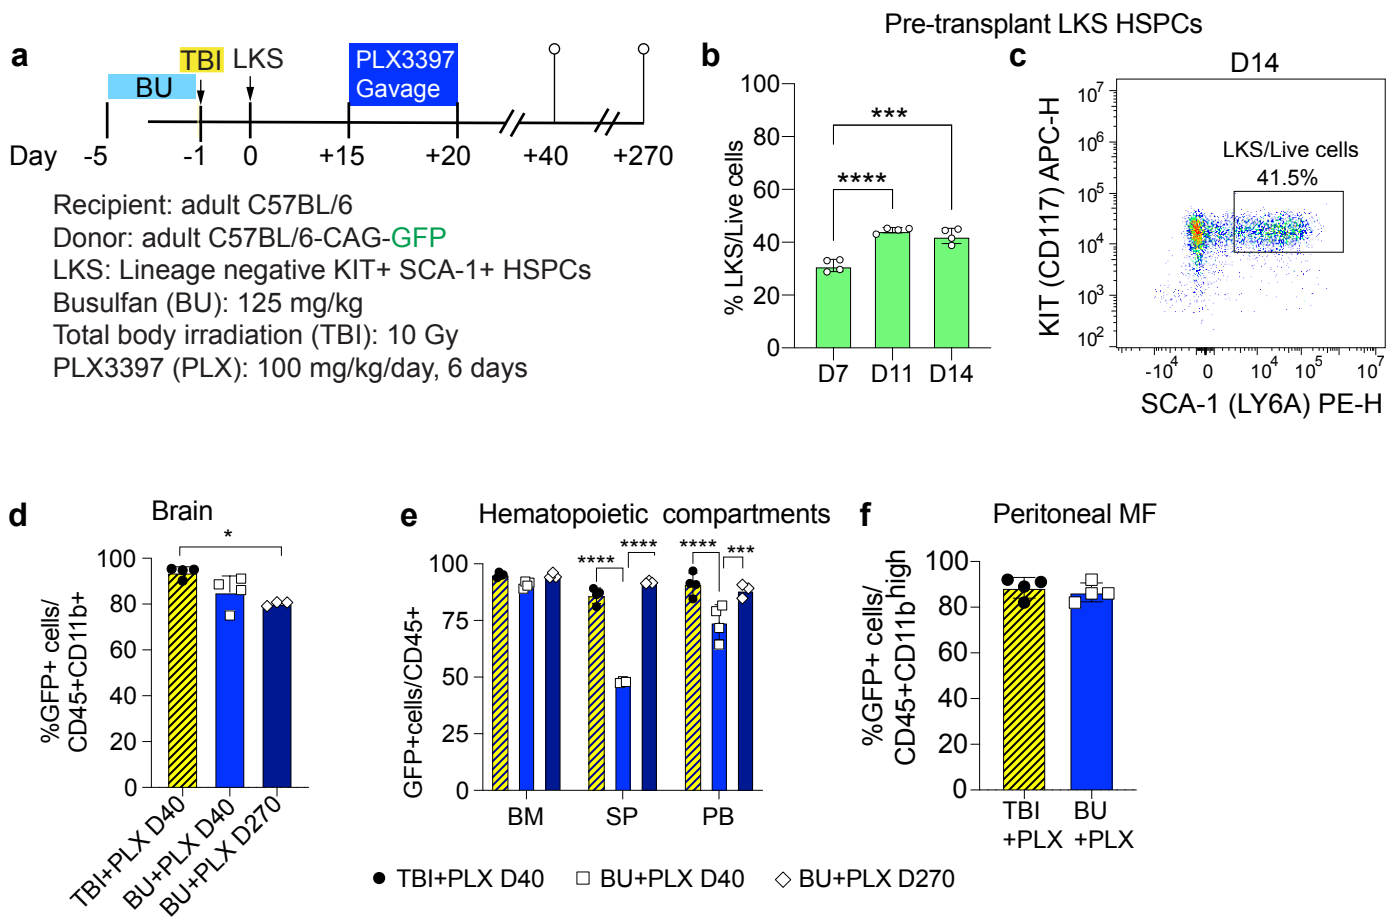

**Supplementary Figure 4. Kinetics of HSPC engraftment using busulfan and six-day PLX3397 conditioning.**  
**a** Experimental timeline showing the conditioning and transplant of adult C57BL/6 mice with Lineage negative KIT<sup>+</sup> SCA-1<sup>+</sup> (LKS) hematopoietic stem and progenitor cells (HSPCs) isolated from adult homozygous C57BL/6-CAG-GFP mice and expanded in culture for 14 days. Follow-up was 40 (D40) or 270 (D270) days after transplant. Myeloablation was performed using either total body irradiation (TBI, 10 Gy) or busulfan (BU, 125 mg/kg). **b** Percentage of HPSCs positive for the stemness markers KIT (CD117) and SCA-1 quantified by flow cytometry at culture day 7 (D7), day 11 (D11), and day 14 (D14); n = 4 mouse donors time point (4 biological replicates). **c** Representative flow plot of LKS HPSCs at culture day 14. **d-f** Percentage of transplant-derived GFP<sup>+</sup> cells in the brain (**d**), hematopoietic compartments [**e**, bone marrow (BM), spleen (SP) and peripheral blood (PB)] and, peritoneum (**f**) at the indicated time points. **b, d-f** Mouse numbers (n): day 40 n = 4 (except spleen for BU + PLX n = 3 mice), day 270 n = 3. Data are Mean ± SD. Source data are provided as a Source Data file. Statistical analysis: \*p < 0.05, \*\*\*p < 0.001, \*\*\*\*p < 0.0001, the exact p-values of all comparisons are reported in the Source Data file; **b** One-way ANOVA with Tukey post-hoc; **d** Kruskal-Wallis with Dunn's post-hoc; **e** Two-way ANOVA with Sidak post-hoc; **f** Two-tailed unpaired t-test. MF: macrophages.

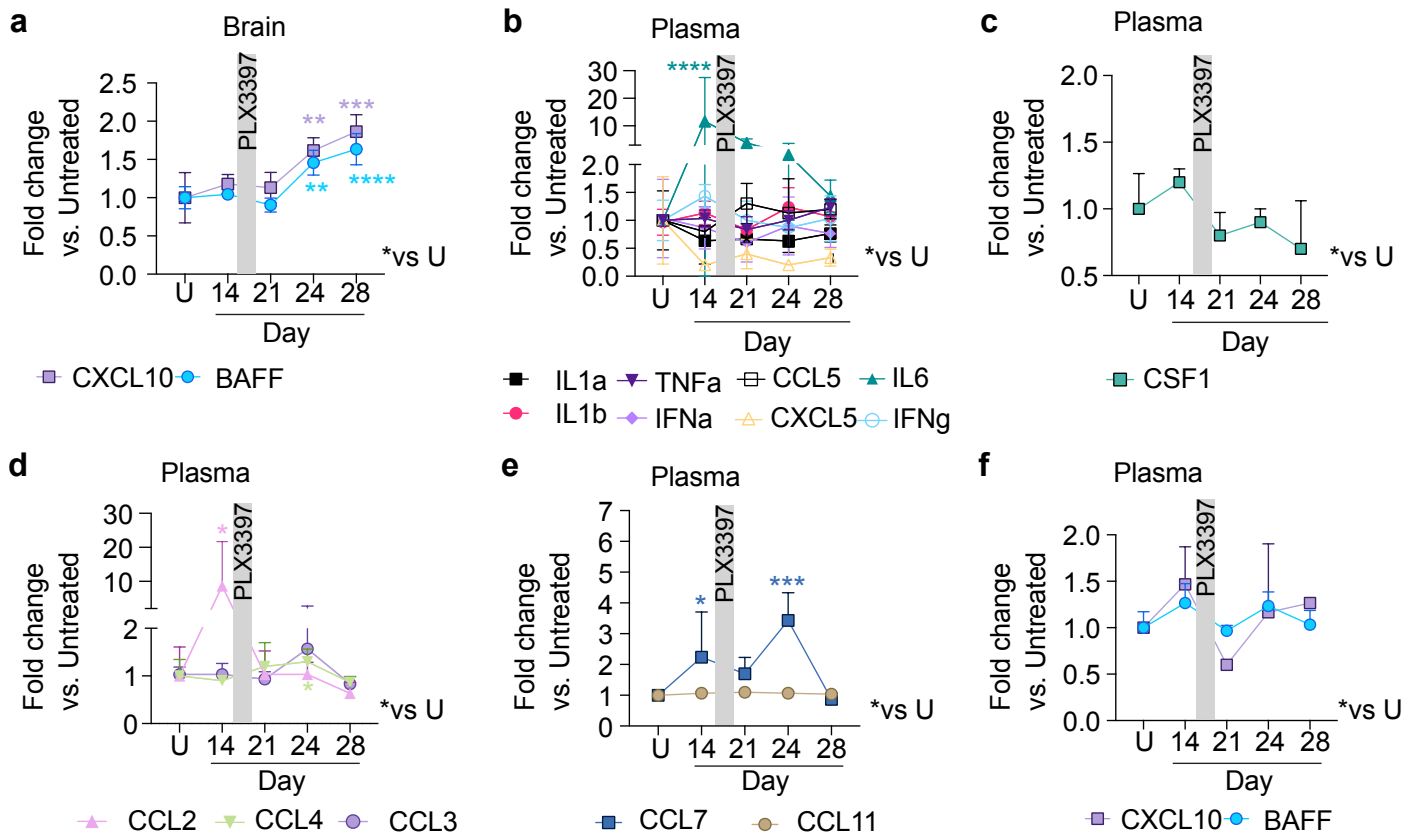

**Supplementary Figure 5. Kinetics of cytokine production and donor cell engraftment using busulfan plus six-day PLX3397 conditioning.**

**a-f** Cytokine analysis performed by 48-plex Luminex assay in brain (**a**) and plasma (**b-f**) of adult C57BL/6 mice conditioned with busulfan and PLX3397 and transplanted with total bone marrow from adult C57BL/6-CAG-GFP mice. The days indicate the time point after bone marrow transplant. The experimental scheme and timeline are depicted in **Fig. 2a**. Cytokine quantifications and statistics are relative to untreated mice (\*p-value vs U). Grey bar: PLX3397 administration window. Mouse numbers (n): n = 3 per time point. **a-f** Data are Mean  $\pm$  SD. Source data are provided as a Source Data file. Statistical analysis: \*p < 0.05, \*\*p < 0.01, \*\*\*p < 0.001, \*\*\*\*p < 0.0001, the exact p-values of all comparisons are reported in the Source Data file; **a-b, d-f** Two-way ANOVA vs Untreated with Dunnett post-hoc; **c** One-way ANOVA vs Untreated with Dunnett post-hoc.

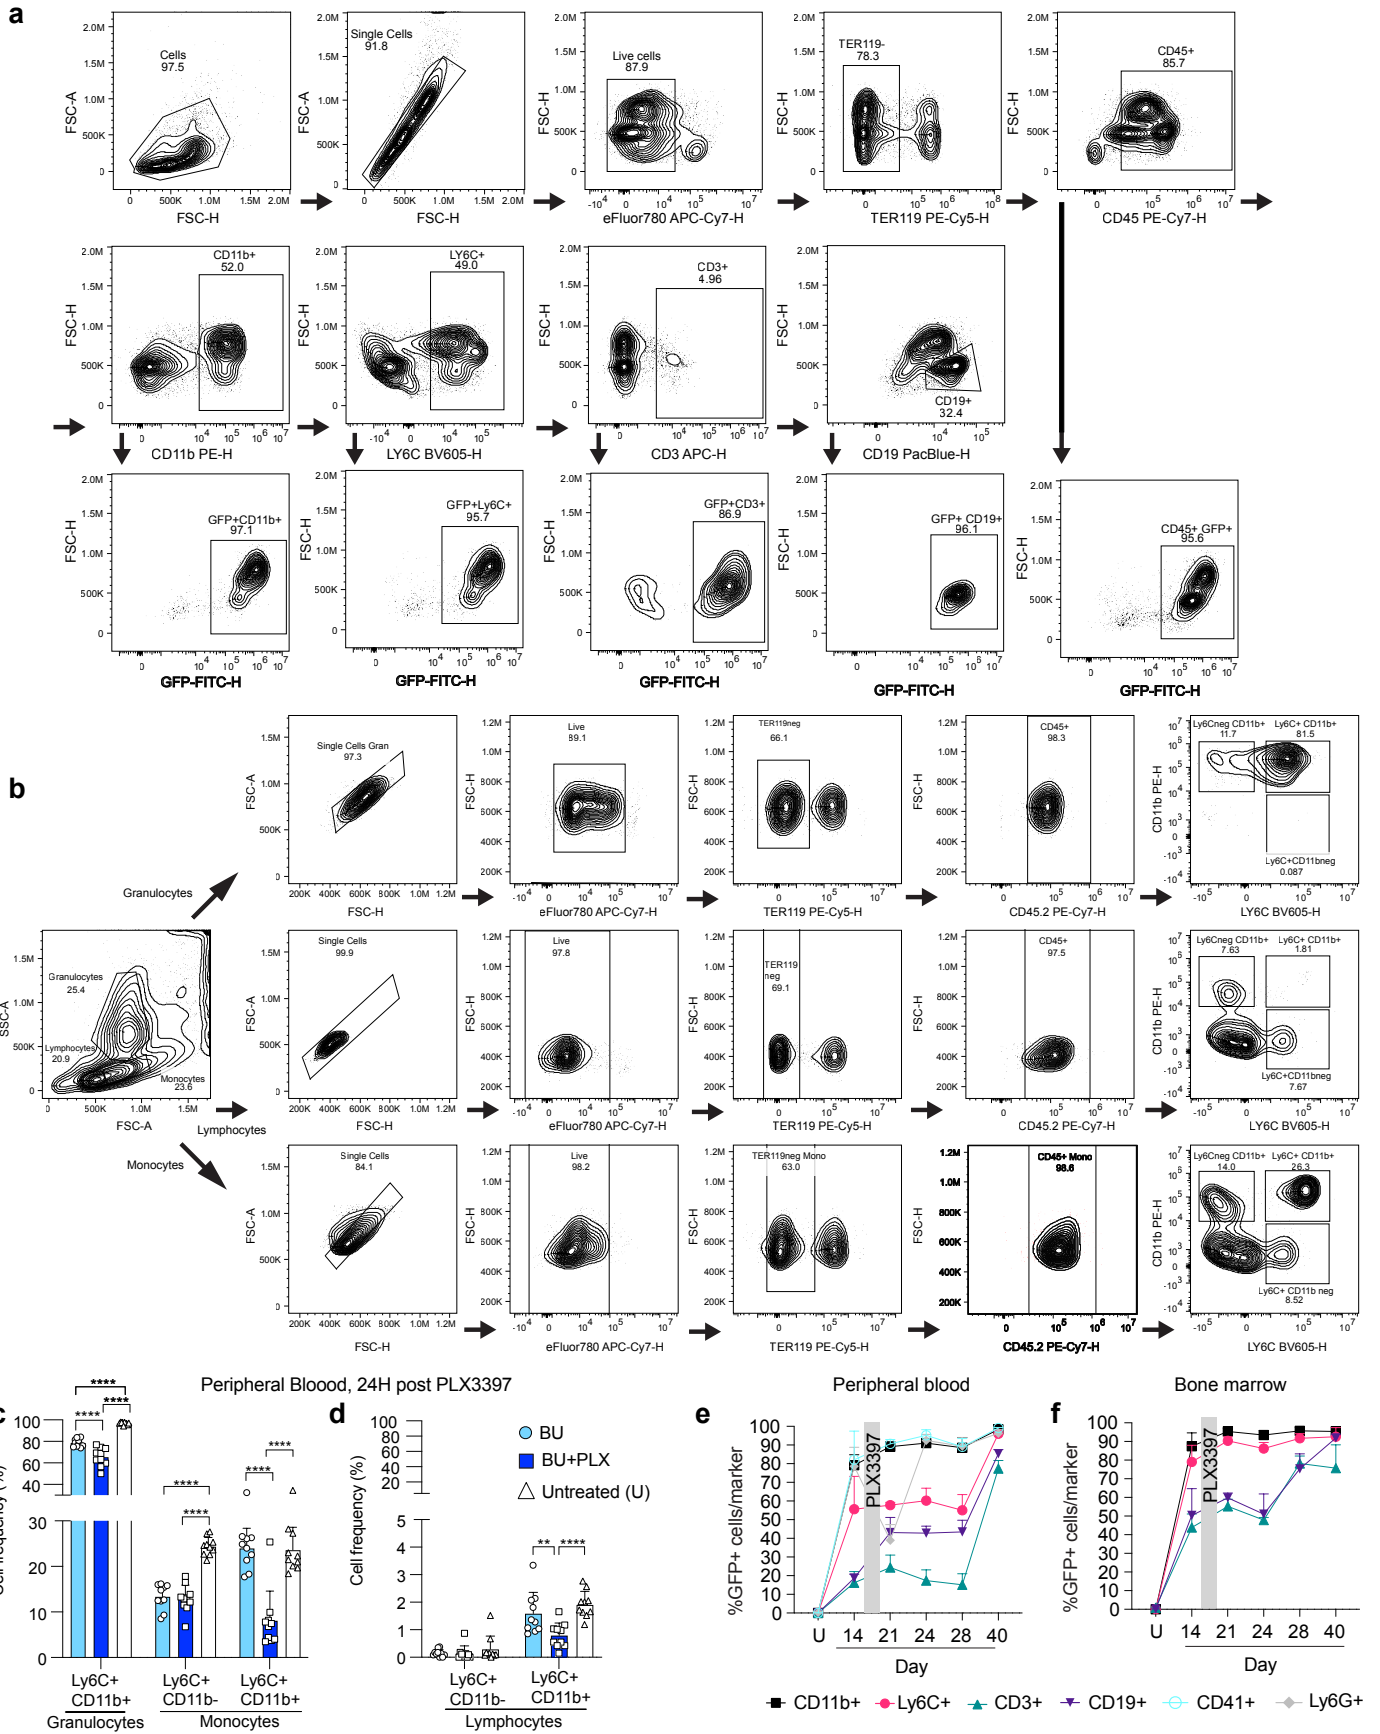

**Supplementary Figure 6. Gating strategy and analysis of hematopoietic lineages and donor chimerism in bone marrow, spleen, and peripheral blood.**

**a** Representative gating strategy of cells isolated from the hematopoietic compartments (bone marrow, spleen, and peripheral blood). The representative flow plots depict the gating strategy used to calculate the percentage of marker-positive cells out of CD45<sup>+</sup> cells and, the percentage of transplant-derived GFP<sup>+</sup> cells. The bone marrow from one adult C57BL/6 mouse transplanted with total bone marrow from C57BL/6-CAG-GFP mice and conditioned with busulfan + PLX3397 is depicted (BU+PLX, **Fig. 1a**). The time point of the analyses is 7 months after bone marrow transplant. **b-d** Analysis of Ly6C<sup>+</sup> cells within lymphocyte, monocyte, and granulocyte lineages in the peripheral blood of adult C57BL/6 mice conditioned with busulfan (BU) or BU+PLX3397 (PLX) and transplanted with total bone marrow from C57BL/6-CAG-GFP mice (timeline shown in **Fig. 1a**). The representative gating strategy distinguishes lymphocytes, monocytes, and granulocytes based on their relative size. The bar plots show the frequency of Ly6C<sup>+</sup> lineages in the peripheral blood 21 days after bone marrow transplant (equivalent to 24 hours after PLX3397 withdrawal), with untreated mice used as controls. Data are reported as Mean  $\pm$  SD; n = 10 mice/cohort. Source data are provided as a Source Data file. **e-f** Kinetics of hematopoietic lineage reconstitution in peripheral blood (**e**) and bone marrow (**f**) of adult C57BL/6 mice before and after BU + PLX conditioning and up to 40 days after transplant. The fraction of GFP<sup>+</sup> myeloid cells (CD11b<sup>+</sup>, Ly6C<sup>+</sup>), platelets (CD41<sup>+</sup>), granulocytes (Ly6G<sup>+</sup>), T cells (CD3<sup>+</sup>), and B cells (CD19<sup>+</sup>) out of total CD45<sup>+</sup> cells measured by flow cytometry is reported; n= 3 mice/time point. Statistical analyses: \*\*p < 0.01, \*\*\*\*p < 0.0001, the exact p-values of all comparisons are reported in the Source Data file; **c-d** Two-way ANOVA with Tukey post-hoc.



### a Peritoneal macrophages

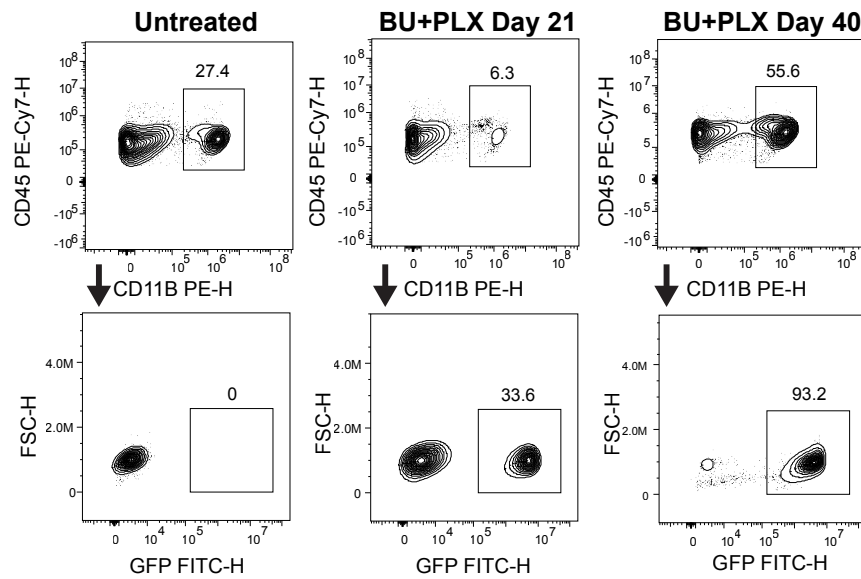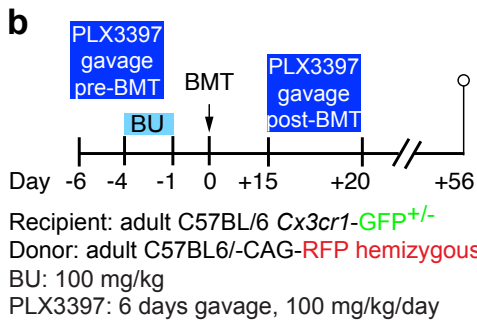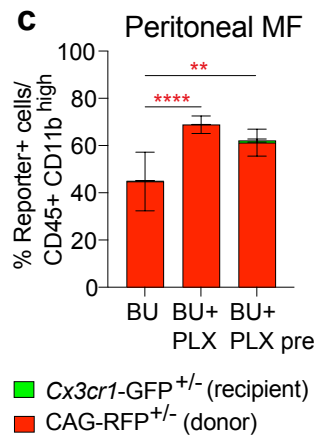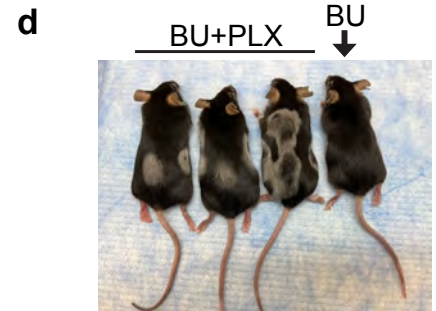

### Supplementary Figure 7. Macrophage gating strategy and analysis of donor macrophage chimerism.

**a** Representative gating strategy of macrophages isolated from mouse organs and peritoneum. CD45<sup>+</sup> CD11b<sup>+</sup> cells are gated on total CD45<sup>+</sup> cells as depicted in **Supp. Fig. 6a**. The flow plots depict the percentage of transplant-derived GFP<sup>+</sup> CD45<sup>+</sup> CD11b<sup>high</sup> macrophages (MF) measured in the peritoneum of adult C57BL/6 mice conditioned with busulfan + PLX3397 (BU + PLX) and transplanted with total bone marrow from C57BL/6-CAG-GFP mice, one mouse/time point is depicted; the time points indicate the days after transplant. The representative flow plots are relative to the data depicted in **Fig. 3k**. **b-c** Analysis of CD45<sup>+</sup> CD11b<sup>high</sup> MF engraftment in the peritoneum of adult C57BL/6-*Cx3cr1-GFP<sup>+/-</sup>* mice treated with BU or BU+ PLX. PLX was given either before or after bone marrow transplant (BMT). **b** Experimental timeline. Follow-up was 2 months after BMT. **c** Fraction of transplant-derived RFP<sup>+</sup> and recipient GFP<sup>+</sup> MF measured by flow cytometry; mouse numbers (n): BU n = 4, BU + PLX n = 4, BU + PLX pre-BMT n = 3. Data are Mean ± SD. Source data are provided as a Source Data file. Statistical analysis: \*\*p < 0.01, \*\*\*p < 0.001; **c** Two-way ANOVA with Tukey post-hoc; the red asterisks show statistically significant differences in the fraction of BMT-derived RFP<sup>+</sup> cells between the indicated groups. The exact p-values of all comparisons are reported in the Source Data file. **d** Representative image showing the patches of hair discoloration observed in adult C57BL/6 mice conditioned with BU + PLX but not the ones conditioned with BU only. The time point of the analyses is 7 months after transplant. The picture is representative of n=10 mice/cohort.

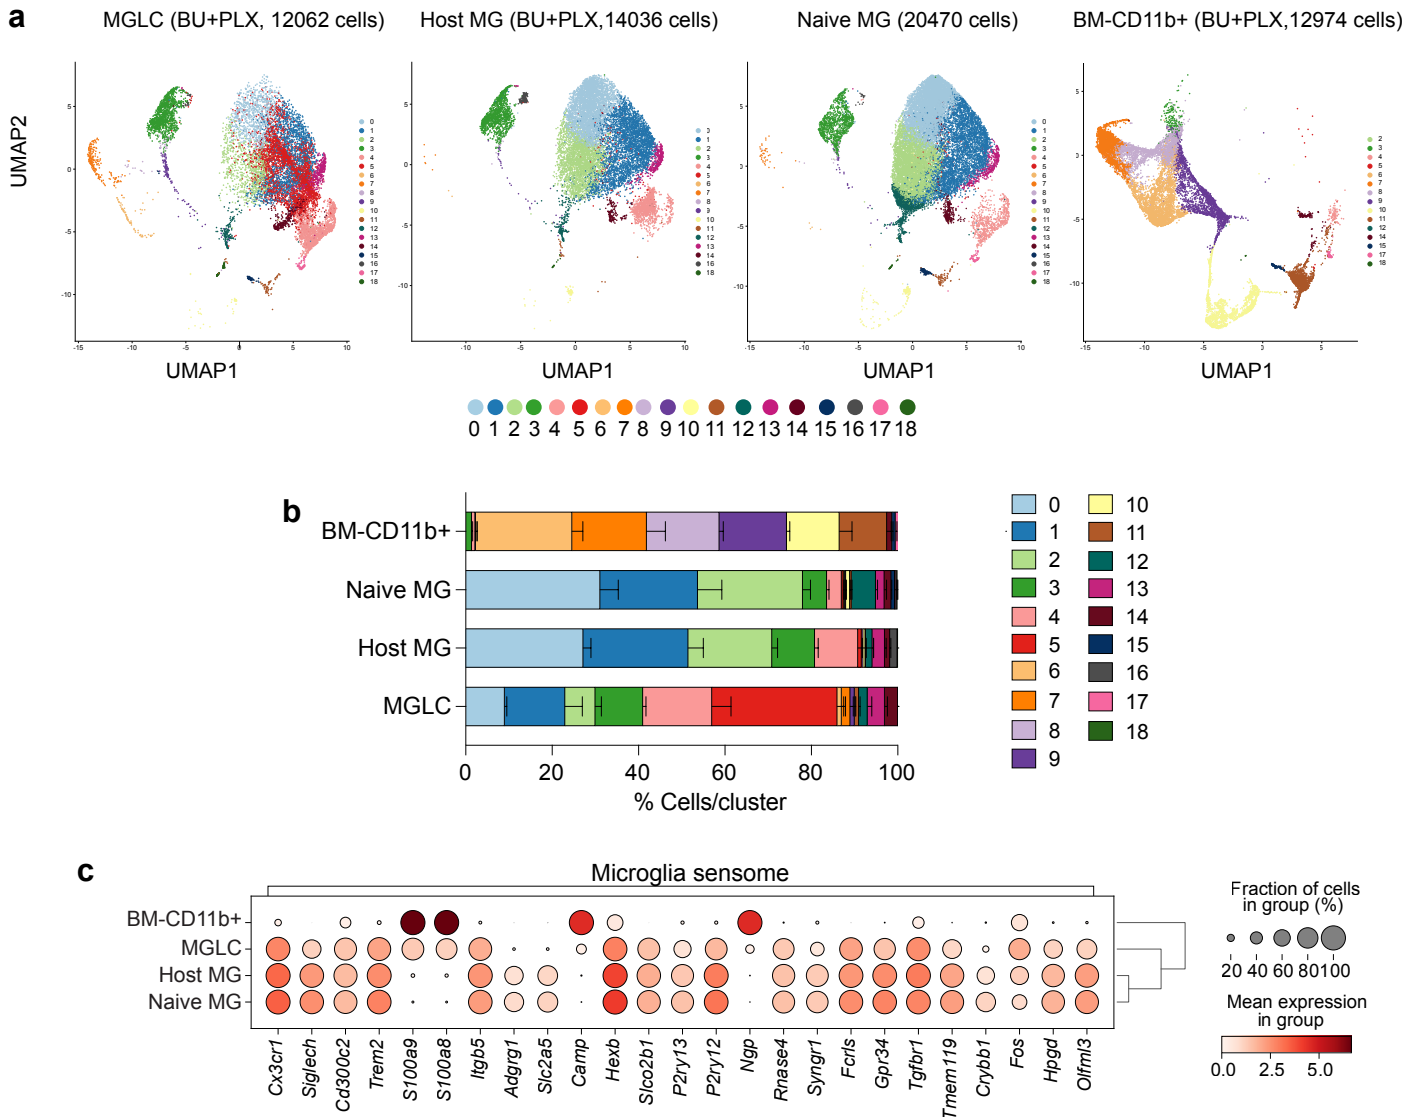

**Supplementary Figure 8. Cluster analysis and gene expression profiling of CD45+ CD11b+ cells using single-cell RNA sequencing.**

**a-c** Analyses of single-cell RNA sequencing (scRNA-seq) data performed on FACS-sorted CD45+CD11b+ cells isolated from adult C57BL/6 mice conditioned with busulfan + PLX3397 (BU+PLX) and transplanted with hematopoietic stem and progenitor cells (HSPCs) isolated from C57BL/6-CAG-GFP mice and expanded in culture. The time point of the analyses is 9 months (day 270) after transplant. GFP+ CD45+ CD11b+ (microglia-like cells or MGLCs,  $n = 3$  mice), GFP- CD45+ CD11b+ (host conditioned MG or host MG,  $n = 3$  mice), GFP+ CD45+ CD11b+ from bone marrow (BM-CD11b+,  $n = 3$  mice). Age- and sex-matched untreated mice were used as control (naive MG,  $n = 3$  mice). The FACS sorting scheme is depicted in **Fig. 4a**; the chimerism data are reported in **Supplementary Fig. 4**. **a** Seurat cluster analyses of MGLCs, host-MG, naive MG, and BM-CD11b+ cells. Each cluster is indicated by a color and a number ( $n = 3$  mice/group). The total number of cells analyzed/group is depicted. **b** Comparison of cluster abundance in each sample ( $n = 3$  mice/sample). The percentage of cells contained in each cluster is depicted. Data are Mean  $\pm$  SD. Source data are provided as a Source Data file. **c** Dot plot showing the differential gene expression of microglia sensome signature genes (Hickman et al.<sup>82</sup>) in each sample ( $n = 3$  mice/sample). The dot size indicates the percentage of cells expressing the gene in each sample/cluster, while the color scale represents the mean gene expression, corresponding to the mean log-normalized UMI counts for each gene. Dendrograms at the right show the sample clustering.

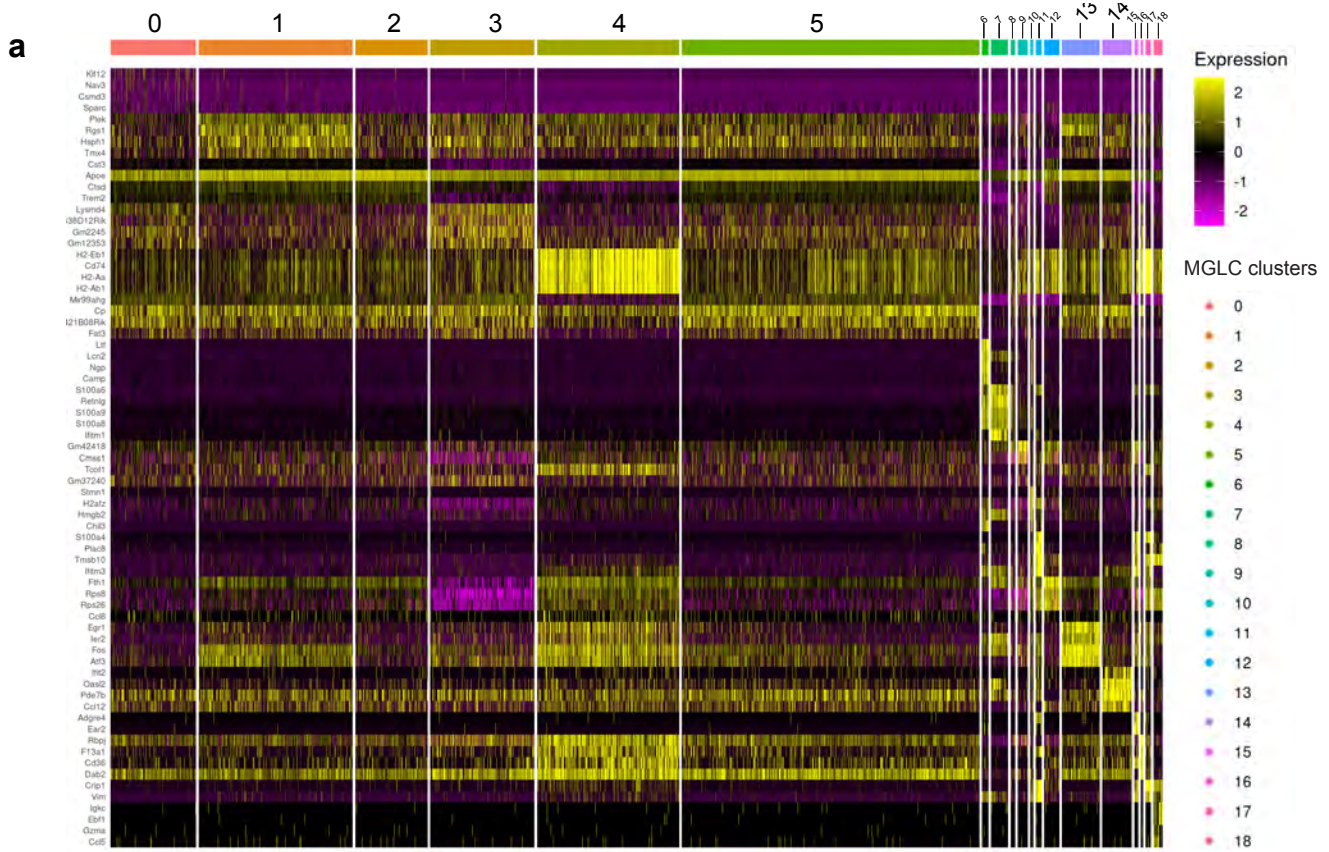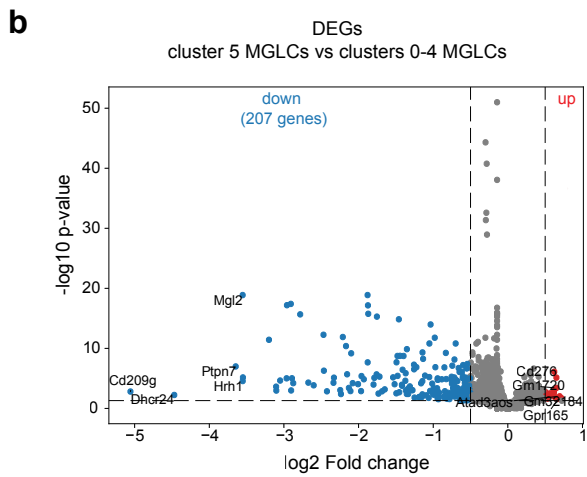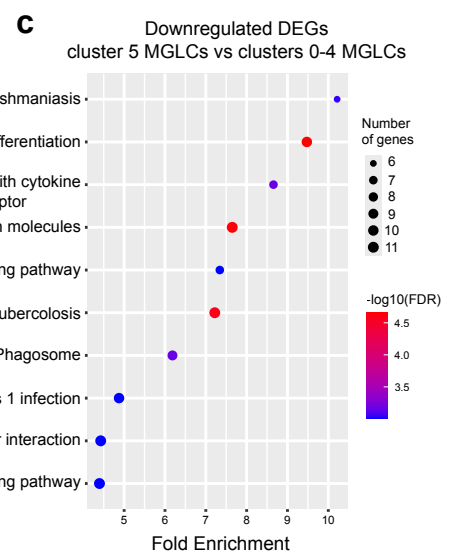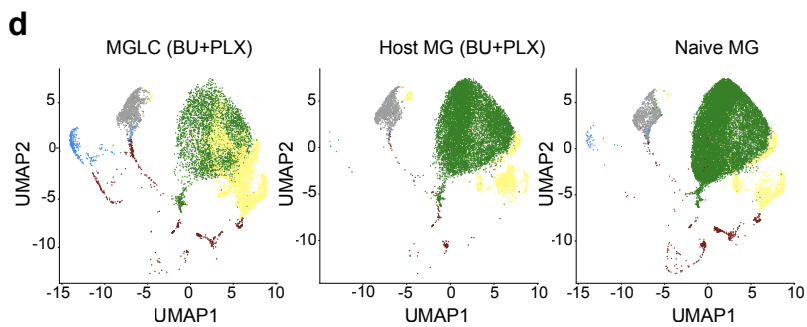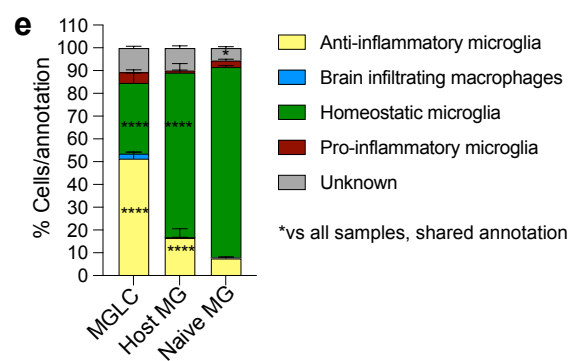



**Supplementary Figure 9. Gene expression profiling of CD45+ CD11b+ cells using single-cell RNA sequencing.**

**a-c** Analyses of single-cell RNA sequencing (scRNA-seq) data performed on FACS-sorted CD45+CD11b+ cells isolated from adult C57BL/6 mice conditioned with busulfan + PLX3397 (BU+PLX) and transplanted with hematopoietic stem and progenitor cells (HSPCs) isolated from adult C57BL/6-CAG-GFP mice and expanded in culture. The time point of the analyses is 9 months (day 270) after transplant. GFP+ CD45+ CD11b+ (microglia-like cells or MGLCs, n = 3 mice), GFP- CD45+ CD11b+ (host conditioned MG or host MG, n = 3 mice), GFP+ CD45+ CD11b+ from bone marrow (BM-CD11b+, n = 3 mice). Age- and sex-matched untreated mice were used as control (naive MG, n = 3 mice). The FACS sorting scheme is depicted in **Fig. 4a**; the chimerism data are reported in **Supplementary Fig. 4**. **a** Heat map showing the top 10 differentially expressed genes (DEGs) per cluster of MGLCs (n = 3 mice); expression scale = z-score. Some genes are included in the top set of multiple clusters. Each column in the heat map depicts the expression of a single cell. The bar color indicates the clusters. **b** Volcano plot showing the differentially expressed genes (DEGs) in MGLC cluster 5 vs MGLC clusters 0 to 4 (n=3 mice/cluster). The top 5 downregulated and upregulated gene names are indicated (x-axis: mean log<sub>2</sub> fold change; y-axis: statistical significance, -log<sub>10</sub> adjusted p-value). **c** Pathway enrichment analyses based on the DEGs downregulated in MGLC cluster 5 vs MGLC clusters 0 to 4 (n=3 mice/cluster). The top 10 significantly enriched pathways and the Fold enrichment are depicted. The dot size reflects the numbers of deregulated genes in each pathway, the color scale indicates the -log<sub>10</sub> False Discovery Rate (FDR). FDR lower than 0.05 is considered statistically significant. **d** Uniform Manifold Approximation and Projection for Dimension Reduction (UMAP) showing the annotation of cells in each sample as homeostatic microglia, pro-inflammatory microglia, brain infiltrating macrophages, anti-inflammatory microglia or not annotated (unknown), n = 3 mice/sample. **e** Percentage of cells included in each annotation. Data are Mean ± SD. Source data are provided as a Source Data file. Statistical analysis: \*p < 0.05, \*\*\*\*p < 0.0001, the exact p-values of all comparisons are reported in the Source Data file; **b** Wald with Benjamini-Hochberg post-hoc correction; **e** Two-way ANOVA with Tukey post-hoc.

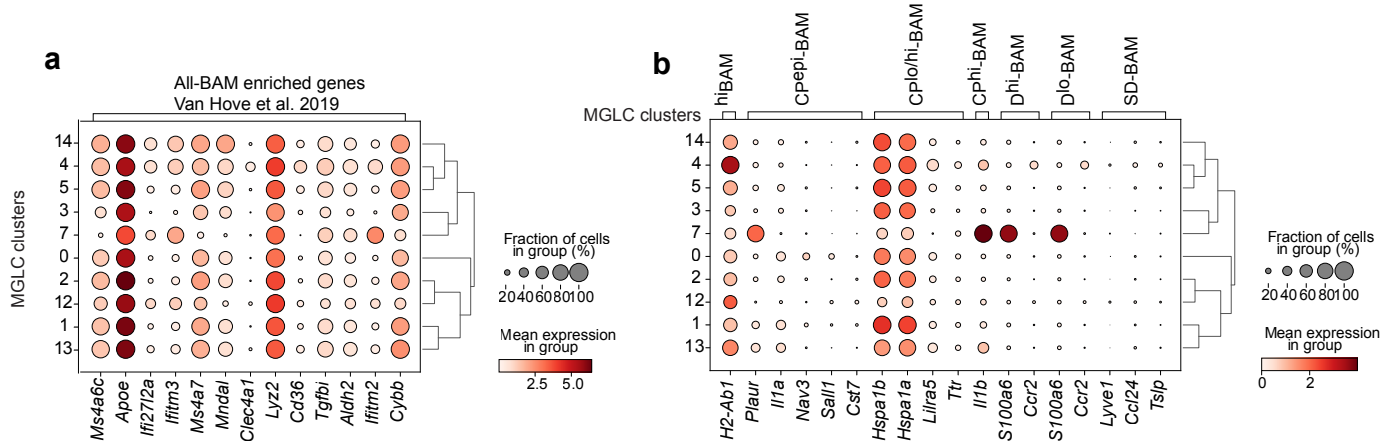

**c** Macrophage aggregate, GSE128855 (Van Hove et al. 2019)

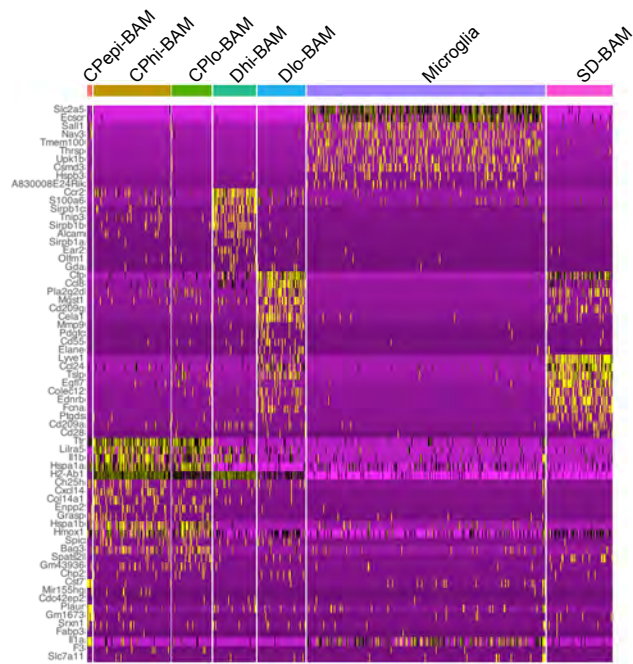

**d** Macrophage aggregate, GSE128855 vs. MGLCs

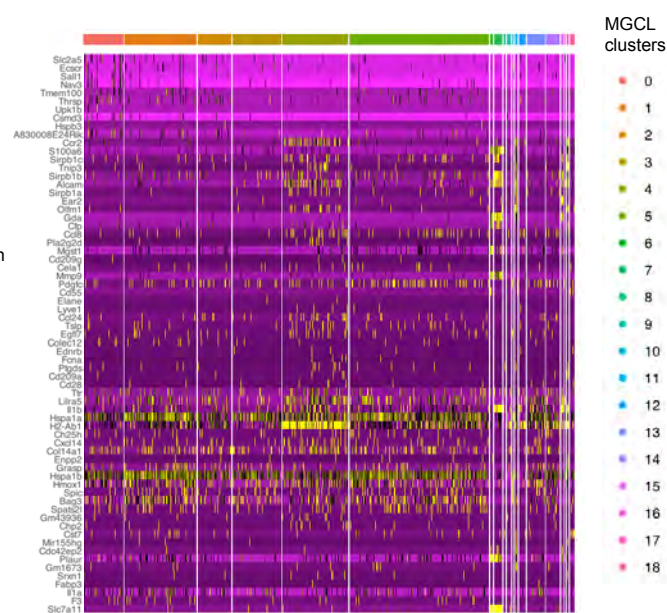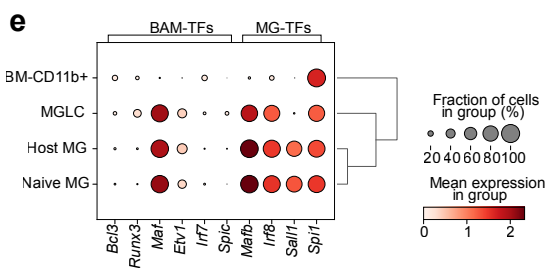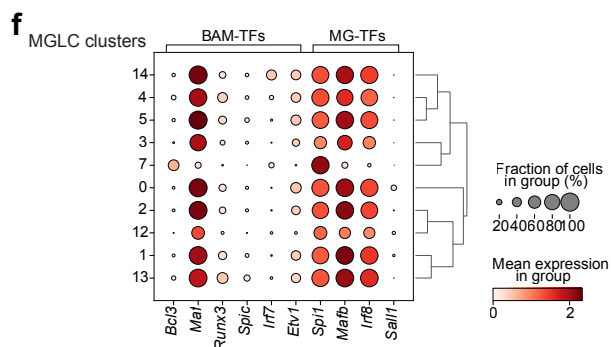

**Supplementary Figure 10. MGLCs upregulate genes characteristic of microglia and brain-border-associated macrophages (BAM).**

**a-b** Analyses of single-cell RNA sequencing (scRNA-seq) data performed on FACS-sorted CD45+CD11b+ cells isolated from adult C57BL/6 mice conditioned with busulfan + PLX3397 (BU+PLX) and transplanted with hematopoietic stem and progenitor cells (HSPCs) isolated from adult C57BL/6-CAG-GFP mice and expanded in culture. The time point of the analyses is 9 months (day 270) after transplant. GFP+ CD45+ CD11b+ (microglia-like cells or MGLCs, n = 3 mice), GFP- CD45+ CD11b+ (host conditioned MG or host MG, n = 3 mice), GFP+ CD45+ CD11b+ from bone marrow (BM-CD11b+, n = 3 mice). Age- and sex-matched untreated mice were used as control (naive MG, n = 3 mice). The FACS sorting scheme is depicted in **Fig. 4a**; the chimerism data are reported in **Supplementary Fig. 4**. **a** Dot plot showing the expression of BAM-enriched signature genes, reported by Van Hove et al (GSE128855)<sup>86</sup>, in the MGLC clusters from the present study (GSE261246, n=3 mice/cluster). **b** Dot plot showing the expression of selected top differentially expressed genes (DEGs) among BAM subpopulations (panel **c**) in MGLC clusters from the present study (GSE261246, n=3 mice/cluster). Dura BAM: D-BAM; subdural meninges BAM: SD-BAM; choroid plexus BAM: CP-BAM. Major histocompatibility complex II (MHCII) genes such as *H2-Ab1*, distinguish BAM expressing high (<sup>high</sup>BAM) and low (<sup>low</sup>BAM) levels of MHCII<sup>86</sup>. **c** Heat map showing the top ten DEGs in D-BAM, SD-BAM, CP-BAM computed using the single-cell RNA-seq data generated by Van Hove et al. (Macrophage aggregate, GSE128855)<sup>86</sup>. **d** Projection of the top 10 DEGs identified in D-BAM, SD-BAM, and CP-BAM (panel **c**) on the MGLC subpopulations/clusters identified in the present work (GSE261246, n = 3 mice/cluster). **c-d** the expression scale indicates the z-score. Some genes are included in the top set of multiple clusters. Each column in the heat map depicts the expression of a single cell. The bar color indicates the subpopulation/clusters. **e-f** Dot plot showing the expression of master transcription factors of microglia and BAMs in each sample (**e**) or MGLC clusters (**f**). Dot size: percentage of cells expressing the gene in each sample/cluster; color scale: mean gene expression, corresponding to the mean log-normalized UMI counts for each gene of interest. Dendrograms at the right show the sample clustering. Source data are provided as a Source Data file.

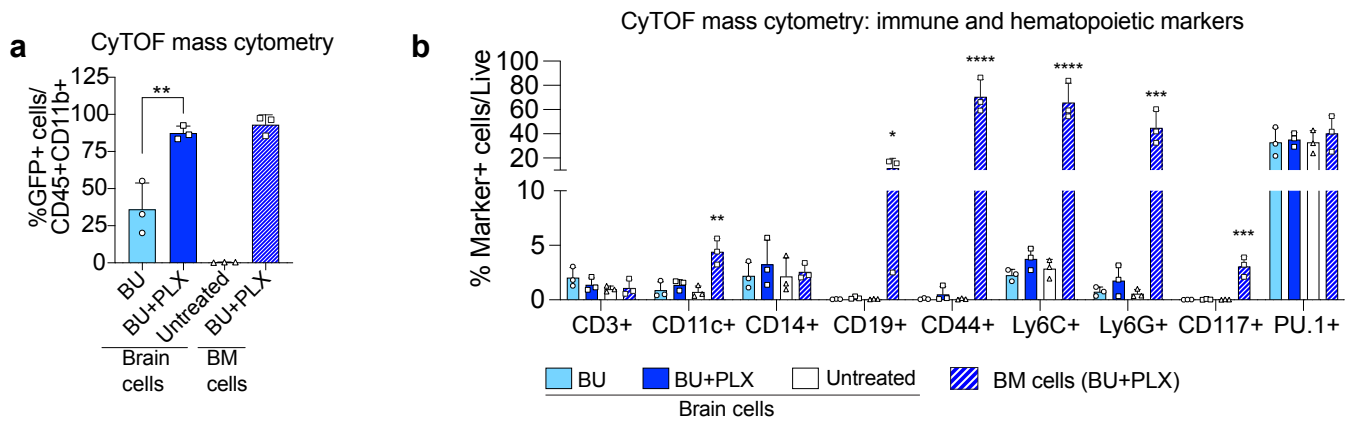

**Supplementary Figure 11. Engraftment of MGLCs and analyses of immune cell markers measured by high-dimensional CyTOF mass cytometry.**

**a-b** Analyses of marker expression by high-dimensional CyTOF mass cytometry in cells isolated from the brain and bone marrow of adult C57BL/6 mice conditioned with either busulfan (BU,  $n = 3$  mice) or BU + PLX3397 (BU+PLX,  $n = 3$  mice) and transplanted with bone marrow from adult C57BL/6-CAG-GFP mice (study depicted in **Fig. 1**). The time point of the analyses is 7 months after bone marrow transplant (BMT). **a** Percentage of transplant-derived GFP+ out of total CD45+CD11b+ as measured by anti-GFP intracellular staining in brain and bone marrow. **b** Percentage of marker-positive cells relative to the total live cells isolated from the brain or bone marrow in each treatment group. The individual markers are depicted on the x-axis. **a-b** Data are reported as Mean  $\pm$  SD. Source data are provided as a Source Data file. Statistical analyses: \* $p < 0.05$ , \*\* $p < 0.01$ , \*\*\* $p < 0.001$ , \*\*\*\* $p < 0.0001$ , the exact p-values of all comparisons are reported in the Source Data file; **a** Two-tailed unpaired t-test between BU vs. BU+PLX (brain); **b** One-way ANOVA vs. with Tukey post-hoc for each marker.

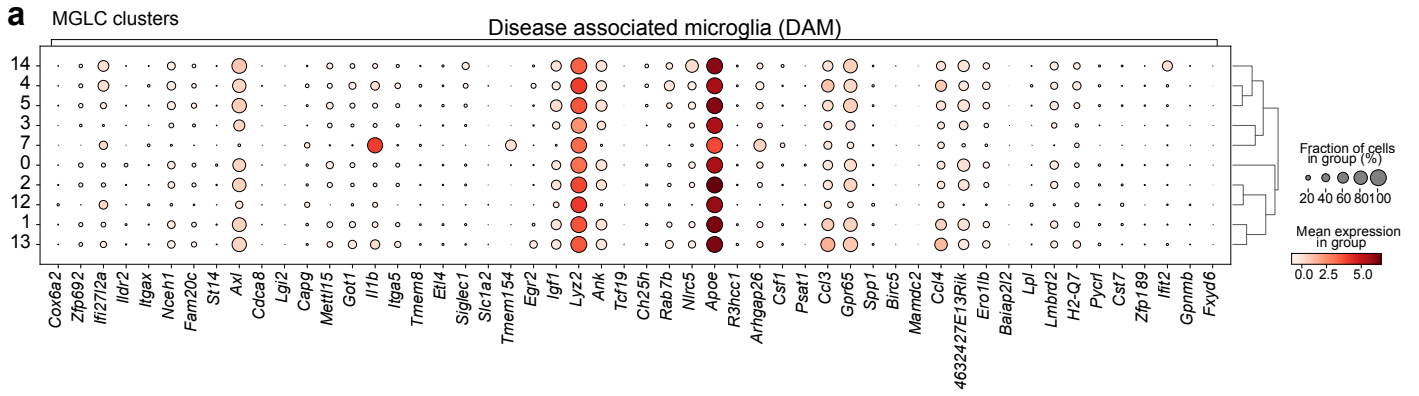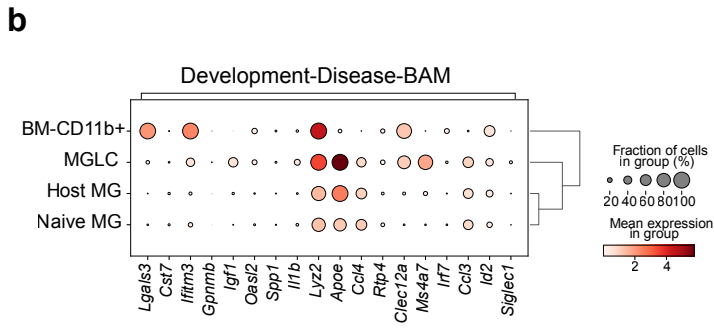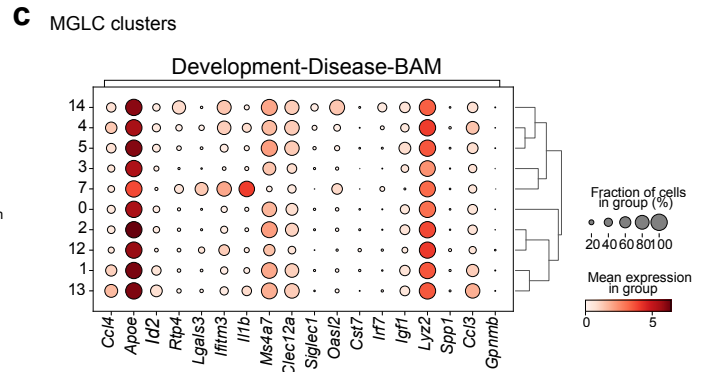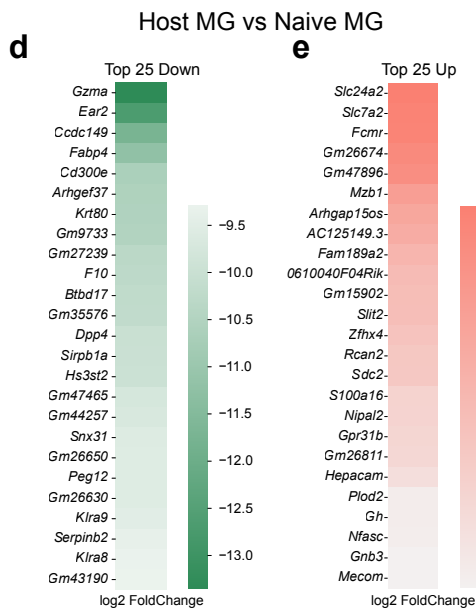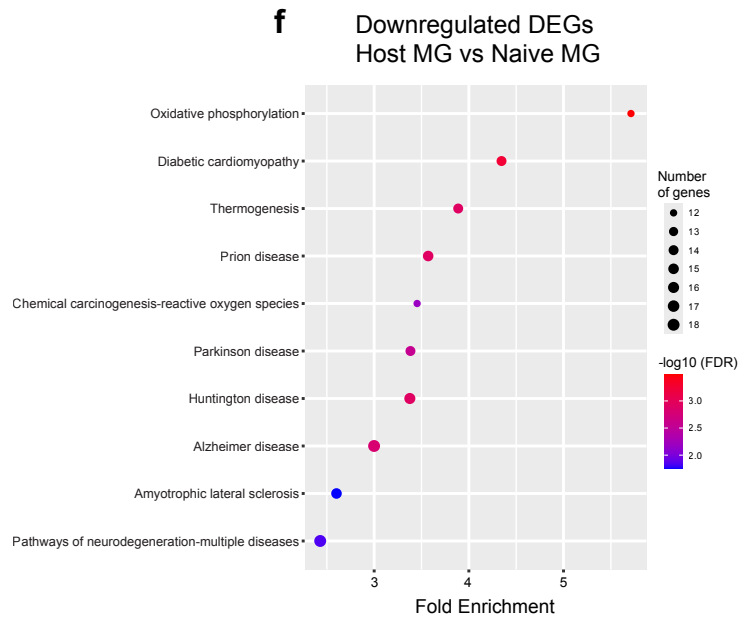

**Supplementary Figure 12. Expression of disease-development-border-associated macrophage genes in MGLCs and altered gene expression in host microglia.**

**a-f** Analyses of single-cell RNA sequencing (scRNA-seq) data performed on FACS-sorted CD45+CD11b+ cells isolated from adult C57BL/6 mice conditioned with busulfan + PLX3397 (BU+PLX) and transplanted with hematopoietic stem and progenitor cells (HSPCs) isolated from adult C57BL/6-CAG-GFP mice and expanded in culture. The time point of the analyses is 9 months (day 270) after transplant. GFP+ CD45+ CD11b+ (microglia-like cells or MGLCs, n = 3 mice), GFP- CD45+ CD11b+ (host conditioned MG or host MG, n = 3 mice), GFP+ CD45+ CD11b+ from bone marrow (BM-CD11b+, n = 3 mice). Age- and sex-matched untreated mice were used as control (naive MG, n = 3 mice). The FACS sorting scheme is depicted in **Fig. 4a**; the chimerism data are reported in **Supplementary Fig. 4**. **a** Dot plot showing the levels of expression of disease-associated microglia (DAM) genes ( $\geq$  3-fold upregulation in DAM vs. naive microglia, Keren-Shaul, et al. 2017<sup>92</sup>) in the MGLC clusters. **b-c** Dot plot showing the expression of genes reported being upregulated by microglia during disease, development, and in BAMs. The expression of disease-development-BAM genes is evaluated in each sample (**b**) and in MGLC clusters (**c**). **a-c** Dot size: percentage of cells expressing the gene in each sample/cluster; color scale: mean gene expression, corresponding to the mean log-normalized UMI counts for each gene of interest. Dendrograms at the right show the sample clustering. **d-e** Top 25 differentially expressed genes (DEGs) in conditioned host MG vs naive MG either downregulated (**d**) or upregulated (**e**). The log<sub>2</sub> fold change is reported. **f** Pathway enrichment analyses using the downregulated DEGs in host MG vs naive MG. The top 10 significantly enriched pathways are depicted. The dot size reflects the number of genes identified in each pathway while the color scale indicates the -log<sub>10</sub> False discovery rate (FDR). FDR lower than 0.05 is considered statistically significant. Statistical analysis: **d-e** Wald with Benjamini-Hochberg post-hoc correction; the exact p-values of all comparisons are reported in the Source Data file. Source data are provided as a Source Data file.

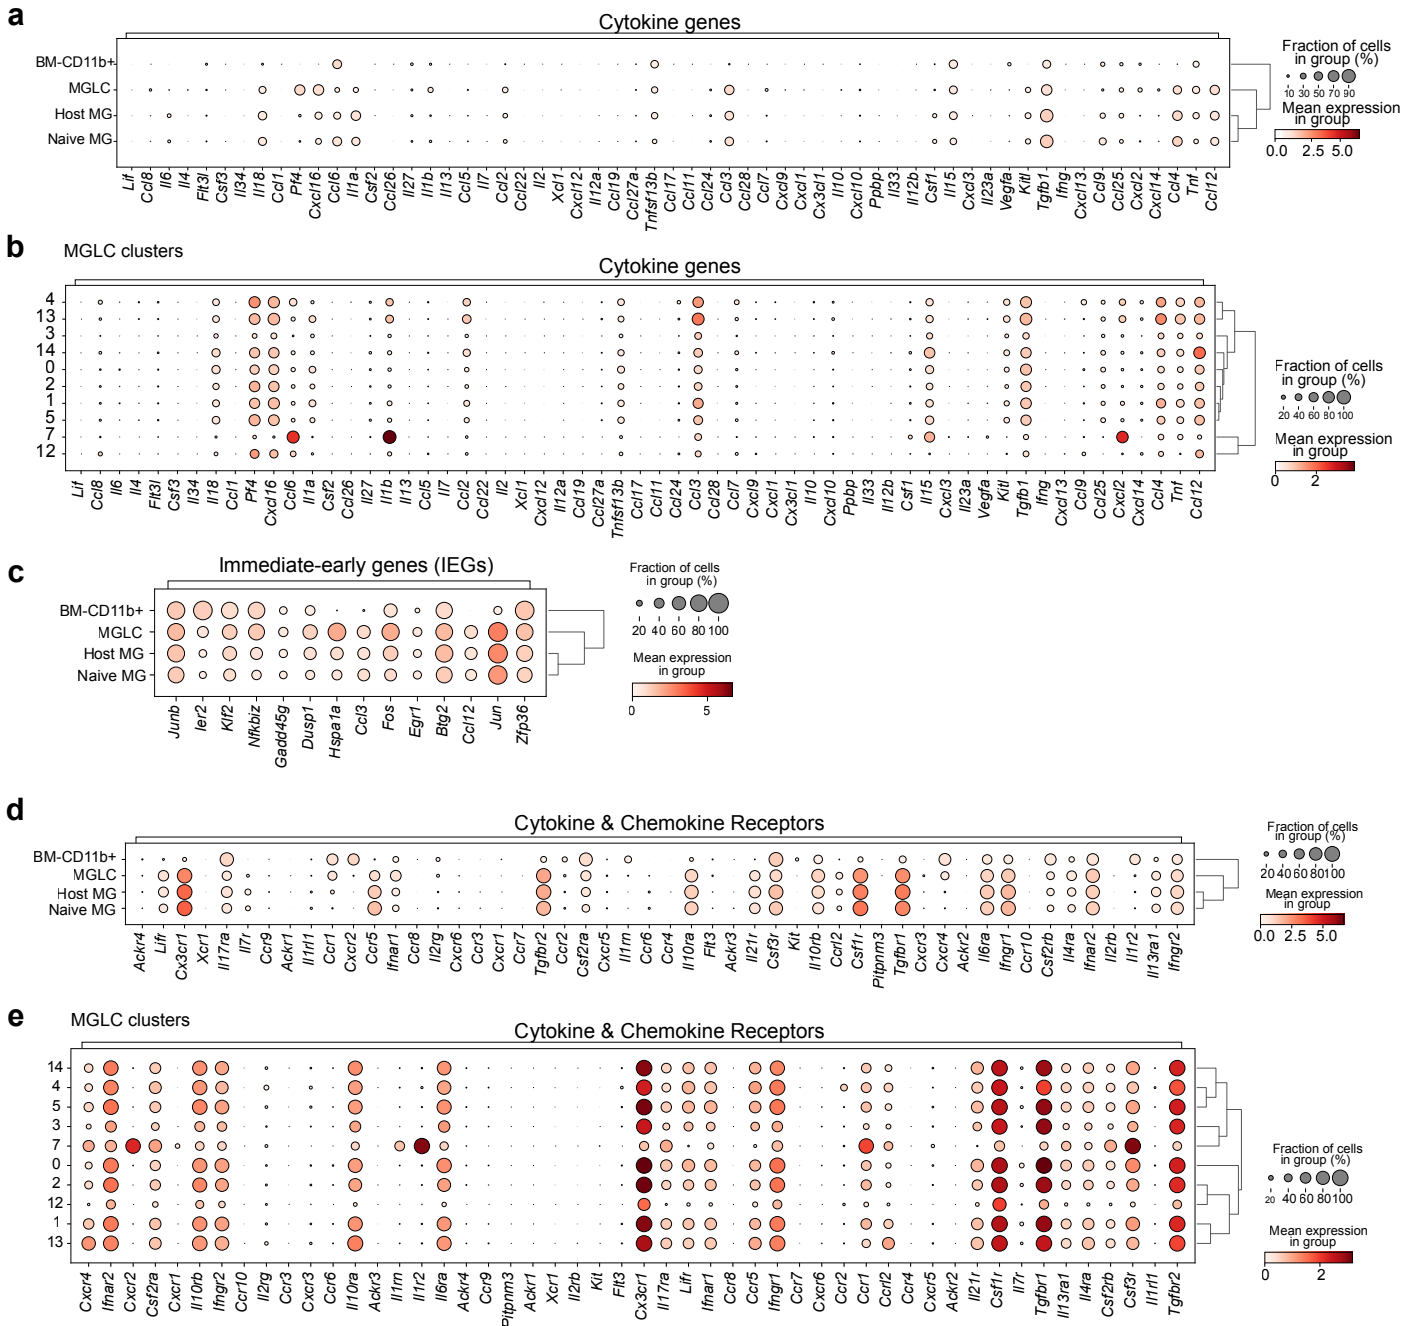

**Supplementary Figure 13. Differential expression of cytokine genes, cytokine receptors genes, and immediate-early genes.**

**a-e** Analyses of single-cell RNA sequencing (scRNA-seq) data performed on FACS-sorted CD45+CD11b+ cells isolated from adult C57BL/6 mice conditioned with busulfan + PLX3397 (BU+PLX) and transplanted with hematopoietic stem and progenitor cells (HSPCs) isolated from adult C57BL/6-CAG-GFP mice and expanded in culture. The time point of the analyses is 9 months (day 270) after transplant. GFP+ CD45+ CD11b+ (microglia-like cells or MGLCs, n = 3 mice), GFP- CD45+ CD11b+ (host conditioned MG or host MG, n = 3 mice), GFP+ CD45+ CD11b+ from bone marrow (BM-CD11b+, n = 3 mice). Age- and sex-matched untreated mice were used as control (naive MG, n = 3 mice). The FACS sorting scheme is depicted in **Fig. 4a**; the chimerism data are reported in **Supplementary Fig. 4**. **a-b** Dot plot showing the expression of cytokine genes in each sample (**a**) and in MGLC cluster (**b**). **c** Dot plot showing the expression of immediate-early genes (IEGs) in each sample. IEGs are reported to be induced following enzymatic microglia isolation. **d-e** Dot plot showing the expression of cytokine and chemokine receptor genes in each sample (**d**) and in each MGLC cluster (**e**). **a-e** Dot size: percentage of cells expressing the gene in each sample/cluster; color scale: mean gene expression, corresponding to the mean log-normalized UMI counts for each gene of interest. Dendrograms at the right show the sample clustering. Source data are provided as a Source Data file.

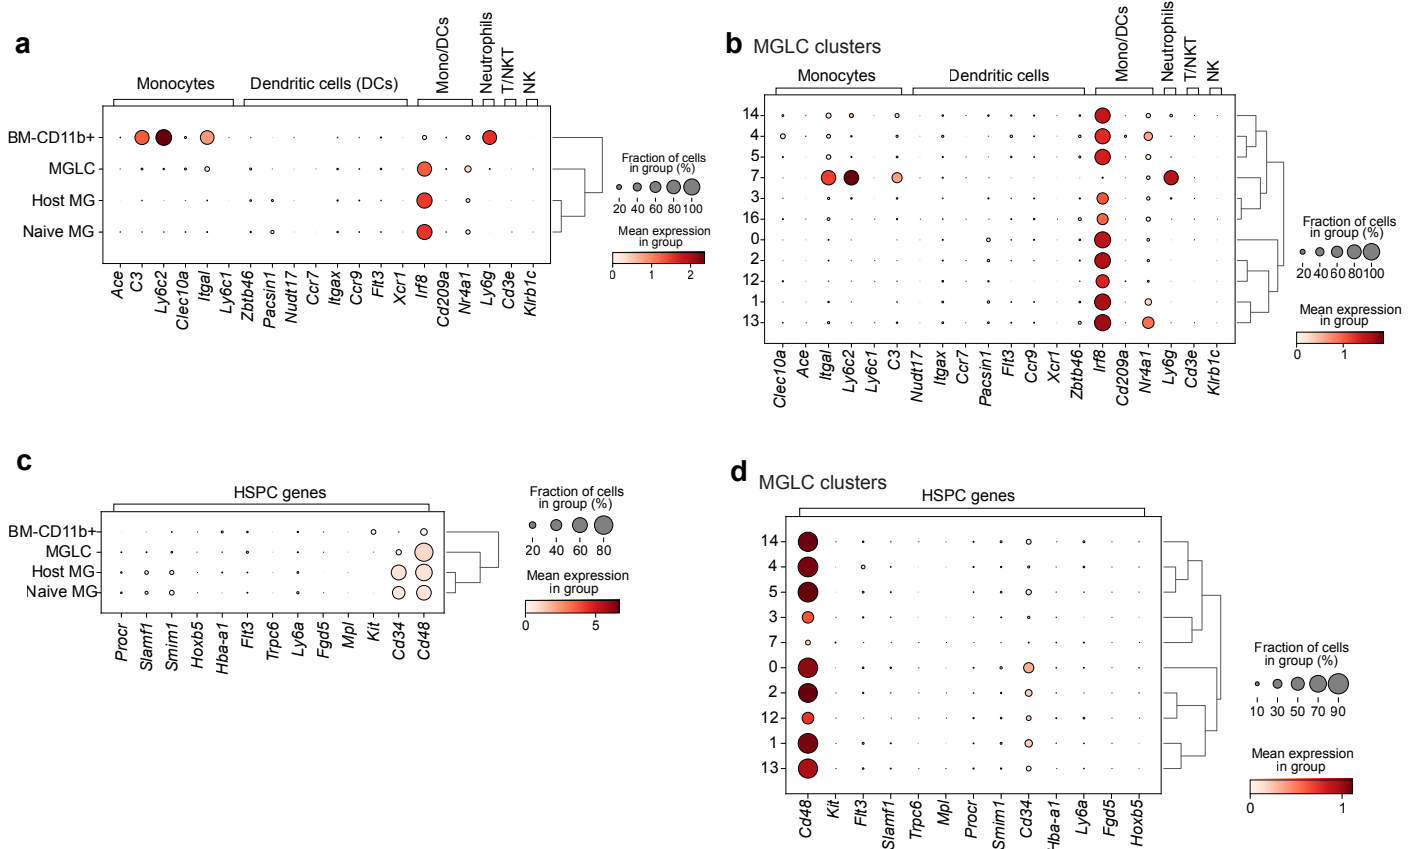

**Supplementary Figure 14. Differential expression of genes expressed in hematopoietic lineages: monocytes, dendritic cells, lymphocytes, and hematopoietic stem and progenitor cells.**

**a-d** Analyses of single-cell RNA sequencing (scRNA-seq) data performed on FACS-sorted CD45+CD11b+ cells isolated from adult C57BL/6 mice conditioned with busulfan + PLX3397 (BU+PLX) and transplanted with hematopoietic stem and progenitor cells (HSPCs) isolated from adult C57BL/6-CAG-GFP mice and expanded in culture. The time point of the analyses is 9 months (day 270) after transplant. GFP+ CD45+ CD11b+ (microglia-like cells or MGLCs, n = 3 mice), GFP- CD45+ CD11b+ (host conditioned MG or host MG, n = 3 mice), GFP+ CD45+ CD11b+ from bone marrow (BM-CD11b+, n = 3 mice). Age- and sex-matched untreated mice were used as control (naive MG, n = 3 mice). The FACS sorting scheme is depicted in **Fig. 4a**; the chimerism data are reported in **Supplementary Fig. 4**. **a-b** Dot plot showing the expression of genes characteristic of monocytes, dendritic cells, neutrophils, T lymphocytes, and natural killer (NK) cells in each sample (**a**) and in MGLC clusters (**b**). **c-d** Dot plot showing the expression of genes characteristic of hematopoietic stem and progenitor cells (HSPCs) in each sample (**c**) and in MGLC clusters (**d**). HSPC markers include *Ly6a* (SCA-1), *Kit* (KIT/CD117), *Slamf1* (CD150) and *Procr* (EPCR). **a-d** Dot size: percentage of cells expressing the gene in each sample/cluster; color scale: mean gene expression, corresponding to the mean log-normalized UMI counts for each gene of interest. Dendrograms at the right show the sample clustering. Source data are provided as a Source Data file.



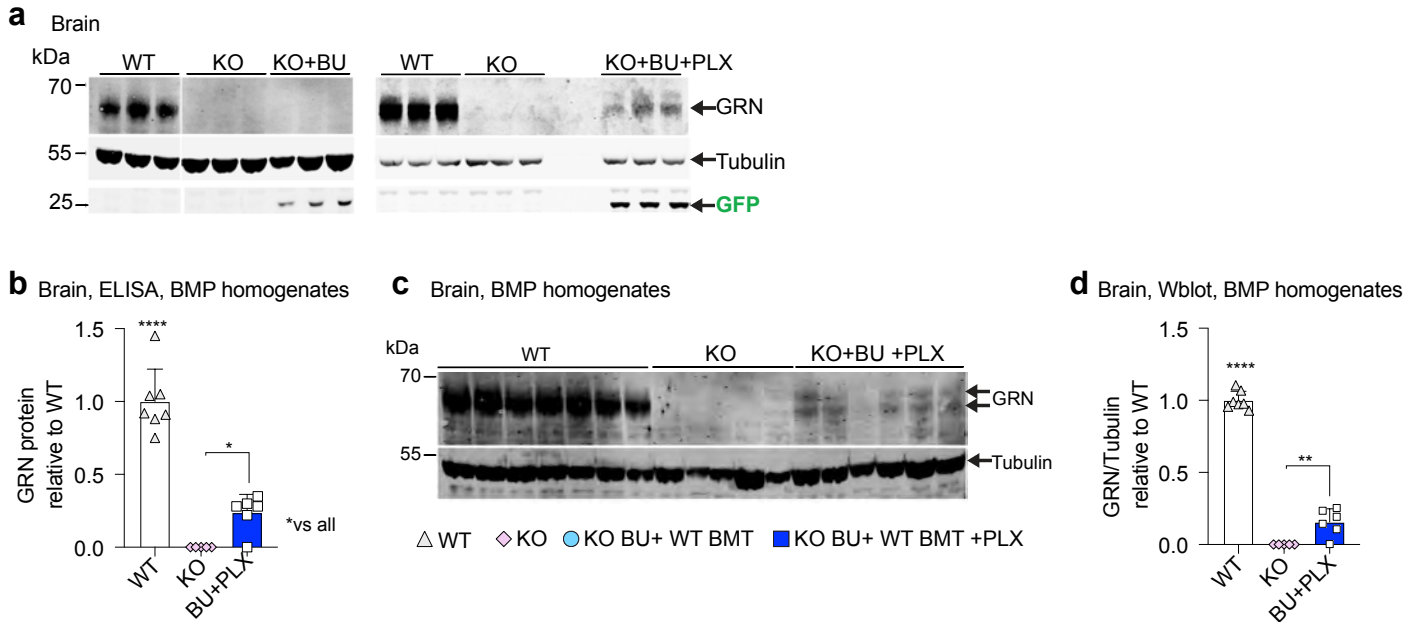

**Supplementary Figure 15. Microglia replacement corrects progranulin deficiency in a mouse model of CLN11/FTD following wild-type bone marrow transplant and busulfan plus PLX3397 conditioning.**

**a** Analysis of 6-month-old *Grn*<sup>-/-</sup> (KO) mice and WT controls. The study scheme and timeline are depicted in **Fig. 7c**. Analyses 4 months after bone marrow transplant (BMT). Follow-up was 4 months (D120) after transplant. Healthy controls: age-matched wild-type C57BL/6 mice (WT); disease controls: KO mice. **a** Representative Western blot analysis of GRN protein amounts in mouse brain lysates at the study end. Tubulin was used as a loading control; the anti-GFP antibody was used to detect the GFP protein expressed by transplant-derived cells. Uncropped blots are in Source Data and Supplementary Fig. 17. The blot is representative of the following mice: n = 6 WT, n = 5 KO, n = 6 BU, n = 6 BU+PLX. **b** Quantification of GRN protein by ELISA assay in brain homogenates used for the quantification of Bis(Monoacylglycerol)Phosphate (BMP) lipids and depicted in **Fig. 8g-h**; mouse numbers (n): WT n = 7, KO n = 5, BU+PLX n = 6). **c-d** Quantification of GRN protein by Western Blots in brain homogenates used for the quantification of BMP lipids and depicted in **Fig. 8g-h**. **c** Western Blot depicting GRN amounts in the brain homogenates; tubulin was used as a loading control; the uncropped blot is depicted in panel c; **d** Quantification of GRN band intensities normalized by tubulin. **c-d** mouse numbers (n): WT n = 7, KO n = 5, BU+PLX n = 6. **b, d** Data are Mean ± SD. The quantification is relative to WT mice. Source data are provided as a Source Data file. Statistical analysis: \*p < 0.05, \*\*p < 0.01, \*\*\*\*p < 0.0001, the exact p-values of all comparisons are reported in the Source Data file; **b** Kruskal-Wallis with Holm-Sidak post-hoc; **d** One-way ANOVA with Tukey post-hoc.

### Locomotion 2-12 months of age

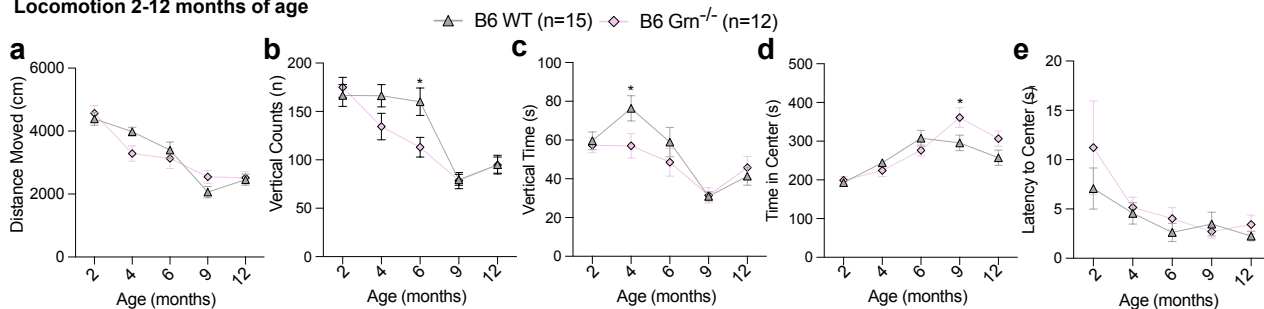

### Three chamber sociability test 6-12 months of age

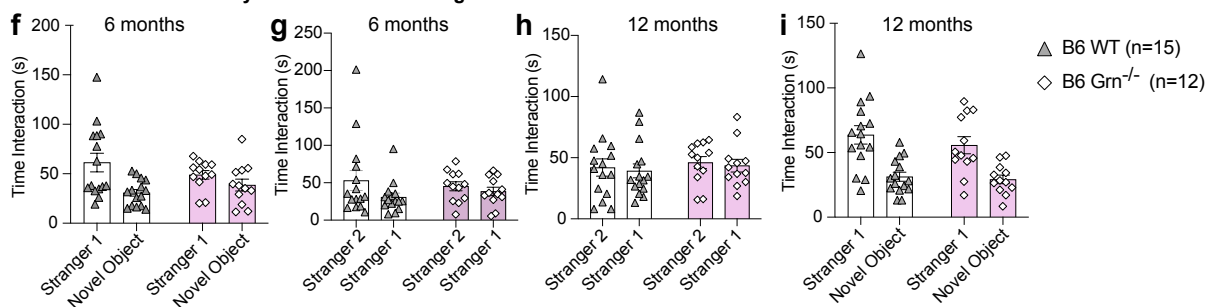

### Spatial memory (Y-Maze test): 6-12 months

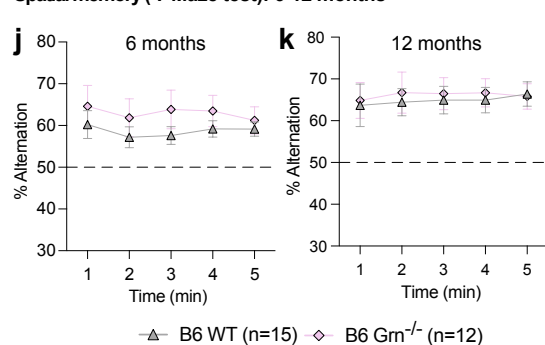

### Associative Memory (passive avoidance test): 6-12 months

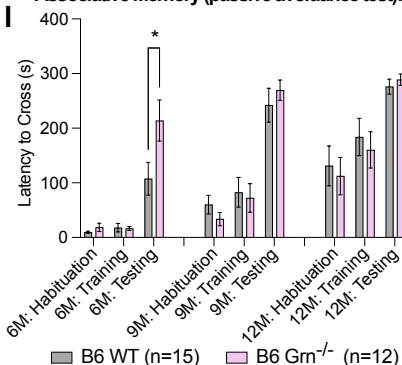

### Nesting: 2-12 months

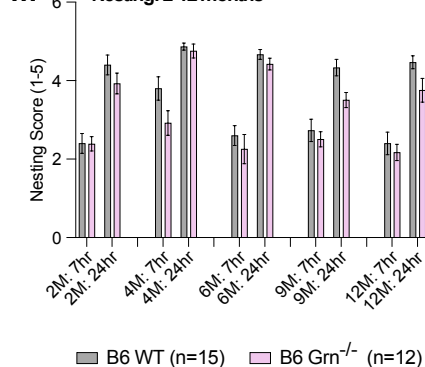

### Grooming: 2-12 months

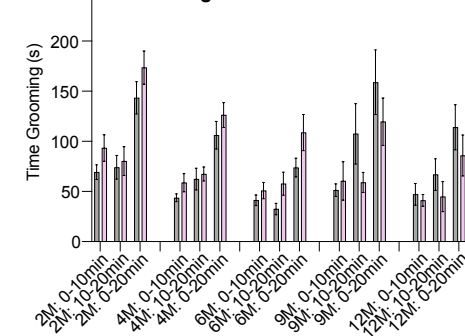

### Survival: 2-13 months

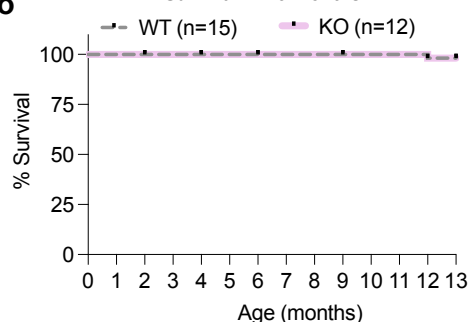

## Supplementary Figure 16. Serial neurobehavioral phenotyping and survival of *Grn*<sup>-/-</sup> mice.

**a-n** Neurobehavioral analysis of untreated wild-type (WT) and untreated *Grn*<sup>-/-</sup> (KO) male mice from 2 to 12 months of age. **a-e** Analyses of mouse locomotion and exploratory behavior at 2, 4, 6, 9, and 12 months of age; mouse numbers (n): WT n=15, KO n=13 at 2 months, KO n=12 at 4, 6, 9, and 12 months. **f-i** Analyses of mouse sociability evaluated using the 3-chamber sociability test at 6 and 12 months of age; mouse numbers (n): WT n=15, KO n=12. **j-k** Analyses of mouse spatial memory using the Y-maze spontaneous alternation test at 6 and 12 months of age; mouse numbers (n): WT n=15, KO n=12. **l** Analyses of mouse associative memory using the passive avoidance test, at 6, 9, and 12 months of age; mouse numbers (n): WT n=15, KO n=12 at 6 and 9 months; WT n=14, KO n=11 at 12 months. **m** Analyses of mouse cognitive deficit evaluated by their nesting ability at 2, 4, 6, 9, and 12 months of age; mouse numbers (n): WT n=15, KO n=13 at 2 months, KO n=12 at 4, 6, 9, and 12 months. **n** Analyses of mouse obsessive-compulsive behavior, reflected by their grooming activity at 2, 4, 6, 9, and 12 months of age; mouse numbers (n): WT n=15, KO n=12. **a-n** Data are reported as Mean ± SE. Source data are provided as a Source Data file. Statistical analyses: \*p < 0.05, \*\*p < 0.01, \*\*\*p < 0.001, \*\*\*\*p < 0.0001, the exact p-values of all comparisons are reported in the Source Data file; **a-n** Two-way ANOVA with Sidak post-hoc. **o** Survival curve of WT (n=15) and *Grn*<sup>-/-</sup> (KO, n=12) mice during the neurobehavioral analysis and up to 13 months of age. One mouse in each cohort died at 12.1 months of age.

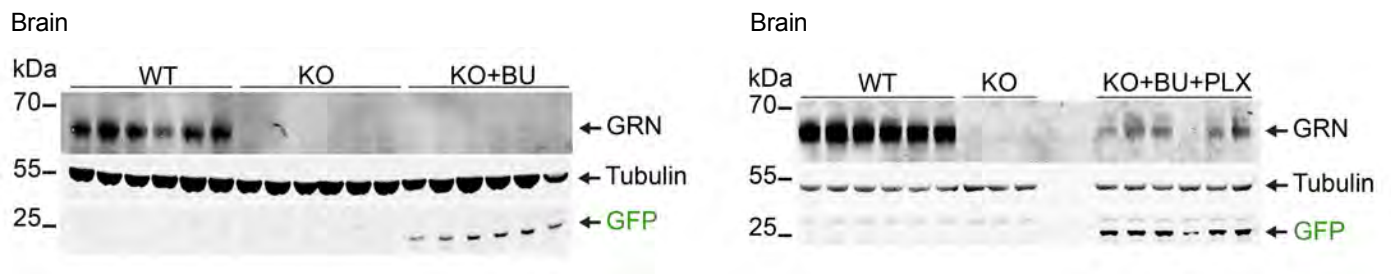

**Supplementary Figure 17. Uncropped blots related to Supplementary Figure 15, panel a.**

Analysis of brain progranulin (GRN) in 6-month-old *Grn*<sup>-/-</sup> (KO) mice and WT controls. The study scheme and timeline are depicted in **Fig. 7c**. Uncropped blots of mouse brain lysates at the study end using anti-GRN antibodies. Tubulin was used as a loading control; the anti-GFP antibody was used to detect the GFP protein expressed by transplant-derived cells. Uncropped blots are included in the Source Data file. Mouse numbers (n): n = 6 WT, n = 6 KO, n = 6 BU (left blot); n = 6 WT, n = 3 KO, n = 6 BU n=6 BU+PLX (right blot).

**Supplementary Table 1. Number of cells included in the single-cell RNA sequencing analyses.**

| Sample                                  | MGLC (BU+PLX) number (N) of cells/mouse                   |             |             | Total Cell Number |
|-----------------------------------------|-----------------------------------------------------------|-------------|-------------|-------------------|
|                                         | Mouse 1                                                   | Mouse 2     | Mouse 3     |                   |
| N of cells pre filtering                | 5684                                                      | 6325        | 1452        |                   |
| N of cells post doublets filtering      | 5258                                                      | 5851        | 1343        |                   |
| N of cells post nFeature_RNA filtering  | 5248                                                      | 5795        | 1343        |                   |
| N of cells post mitochondrial filtering | 5092                                                      | 5681        | 1289        |                   |
| <b>N of cells post filtering</b>        | <b>5092</b>                                               | <b>5681</b> | <b>1289</b> | <b>12062</b>      |
|                                         |                                                           |             |             |                   |
| Sample                                  | host MG (BU+PLX), number (N) of cells/mouse               |             |             | Total Cell Number |
|                                         | Mouse 1                                                   | Mouse 2     | Mouse 3     |                   |
| N of cells pre filtering                | 8535                                                      | 2596        | 4346        |                   |
| N of cells post doublets filtering      | 7895                                                      | 2401        | 4020        |                   |
| N of cells post nFeature_RNA filtering  | 7809                                                      | 2389        | 4009        |                   |
| N of cells post mitochondrial filtering | 7743                                                      | 2344        | 3949        |                   |
| <b>N of cells post filtering</b>        | <b>7743</b>                                               | <b>2344</b> | <b>3949</b> | <b>14036</b>      |
|                                         |                                                           |             |             |                   |
| Sample                                  | naïve MG, number (N) of cells/mouse                       |             |             | Total Cell Number |
|                                         | Mouse 1                                                   | Mouse 2     | Mouse 3     |                   |
| N of cells pre filtering                | 8306                                                      | 7142        | 6866        |                   |
| N of cells post doublets filtering      | 7683                                                      | 6606        | 6351        |                   |
| N of cells post nFeature_RNA filtering  | 7646                                                      | 6587        | 6335        |                   |
| N of cells post mitochondrial filtering | 7603                                                      | 6559        | 6308        |                   |
| <b>N of cells post filtering</b>        | <b>7603</b>                                               | <b>6559</b> | <b>6308</b> | <b>20470</b>      |
|                                         |                                                           |             |             |                   |
| Sample                                  | BM-CD11b <sup>+</sup> (BU+PLX), number (N) of cells/mouse |             |             | Total Cell Number |
|                                         | Mouse 1                                                   | Mouse 2     | Mouse 3     |                   |
| N of cells pre filtering                | 4855                                                      | 4701        | 4750        |                   |
| N of cells post doublets filtering      | 4491                                                      | 4348        | 4394        |                   |
| N of cells post nFeature_RNA filtering  | 4399                                                      | 4296        | 4337        |                   |
| N of cells post mitochondrial filtering | 4375                                                      | 4278        | 4321        |                   |
| <b>N of cells post filtering</b>        | <b>4375</b>                                               | <b>4278</b> | <b>4321</b> | <b>12974</b>      |

**Supplementary Table 2. CyTOF antibody panel.**

| Antigen            | Clone       | Supplier                  | Metal Isotope | Catalog number | RRID       | Epitope   | Dilution (µg/mL) | Staining <sup>a, b</sup> |
|--------------------|-------------|---------------------------|---------------|----------------|------------|-----------|------------------|--------------------------|
| CD45               | 30-F11      | Fluidigm                  | Y89           | 3089005B       | AB_2651152 |           | 1                | S                        |
| cPARP <sup>c</sup> | F21-852     | BD Biosciences            | La139         | 552597         | N/A        | cleaved   | 0.5              | I                        |
| Ly-6G              | 1A8         | Fluidigm                  | Pr141         | 3141008B       | AB_2814678 |           | 2                | S                        |
| CD185              | 614641      | Fluidigm                  | Nd142         | 3142008B       | N/A        |           | 2                | S                        |
| CD115              | AFS98       | Fluidigm                  | Nd144         | 3144012B       | AB_2895116 |           | 2                | S, I                     |
| F4/80              | BM8         | Fluidigm                  | Nd146         | 3146008B       | AB_2895117 |           | 2                | S                        |
| CD11b              | M1/70       | Fluidigm                  | Nd148         | 3148003B       | AB_2814738 |           | 2                | S                        |
| CD19               | 6D5         | Fluidigm                  | Sm149         | 3149002B       | AB_2814679 |           | 2                | S                        |
| p53                | DO-7        | Biolegend                 | Nd150         | 3150024B       | N/A        | total     | 2                | S                        |
| CD64               | X54-5/7.1   | Fluidigm                  | Eu151         | 3151012B       | AB_2814680 |           | 2                | S                        |
| Ki67 <sup>c</sup>  | B56         | BD                        | Sm152         | 556003         | N/A        | total     | 2                | I                        |
| Mac-2              | M3/38       | Fluidigm                  | Eu153         | 3153026B       | AB_2814900 |           | 2                | S, I                     |
| TER-119            | TER-119     | Fluidigm                  | Sm154         | 3154005B       | N/A        |           | 2                | S                        |
| CD14               | Sa14-2      | Fluidigm                  | Gd156         | 3156009B       | AB_2814681 |           | 2                | S                        |
| PU.1 <sup>c</sup>  | 9G7         | Cell Signaling Technology | Gd157         | 22588F         | N/A        | total     | 2                | I                        |
| CD184              | L276F12     | Fluidigm                  | Tb159         | 3159030B       | N/A        |           | 2                | S, I                     |
| MIP1beta           | D21-1351    | Fluidigm                  | Gd160         | 3160013B       | N/A        |           | 2                | S, I                     |
| Ly-6C              | HK1.4       | Fluidigm                  | Dy162         | 3162014B       | AB_2922921 |           | 2                | S                        |
| CX3CR1             | SA011F11    | Fluidigm                  | Dy164         | 3164023B       | AB_2832247 |           | 2                | S                        |
| CD3e               | 145-2C11    | Fluidigm                  | Ho165         | 3165020B       | N/A        |           | 2                | S                        |
| GFP                | SF12.4      | Fluidigm                  | Tm169         | 3169009B       | AB_2814899 |           | 1                | I                        |
| CD169              | 3D6.112     | Fluidigm                  | Er170         | 3170018B       | AB_2885022 |           | 2                | S                        |
| CD44               | IM7         | Fluidigm                  | Yb171         | 3171003B       | AB_2895121 |           | 2                | S                        |
| CD86               | GL1         | Fluidigm                  | Yb172         | 3172016B       | AB_2922923 |           | 2                | S                        |
| CD117              | 2B8         | Fluidigm                  | Yb173         | 3173004B       | AB_2811230 |           | 2                | S                        |
| I-A/I-E            | M5/114.15.2 | Fluidigm                  | Yb174         | 3174003B       | AB_2922924 |           | 2                | S                        |
| pprS6 <sup>c</sup> | N7-548      | BD Biosciences            | Yb175         | Custom         | N/A        | pS235/236 | 2                | I                        |
| pCREB              | 87G3        | Fluidigm                  | Yb176         | 3176005A       | AB_2934290 | pS133     | 2                | I                        |
| CD11c              | N418        | Fluidigm                  | Bi209         | 3209005B       | AB_2811244 |           | 2                | I                        |

<sup>a</sup>Surface staining (S); <sup>b</sup>Intracellular staining (I); <sup>c</sup>Custom conjugation.

**Supplementary Table 3. Primary antibodies.**

| Antigen                                    | Conjugation  | Clone           | RRID        | Supplier                                | Catalog number | Dilution                         |
|--------------------------------------------|--------------|-----------------|-------------|-----------------------------------------|----------------|----------------------------------|
| BD Fc BloBlock™                            | unconjugated | 2.4G2           | AB_394656   | BD Biosciences                          | BDB553142      | 100                              |
| CD45                                       | PE-Cy7       | 104             | AB_2573350  | Thermo Fisher Scientific                | 25-0454-82     | 100                              |
| CD45                                       | PE-Cy7       | 30F11           | AB_312979   | BioLegend                               | 103114         | 100                              |
| CD11b                                      | PE           | M1/70           | AB_312791   | BioLegend                               | 101208         | 100                              |
| TER-119                                    | PE-Cy5       | TER-119         | AB_468810   | Thermo Fisher Scientific                | 15-5921-83     | 200                              |
| Ly6C                                       | BV605        | AL-21           | AB_2737949  | BD Biosciences                          | BDB563011      | 100                              |
| CD3                                        | APC          | 17A2            | AB_10597589 | Thermo Fisher Scientific                | 17-0032-82     | 100                              |
| CD19                                       | PB           | 6D3             | AB_439718   | BioLegend                               | 115523         | 100                              |
| Ly6G                                       | PE           | 1A8             | AB_1186099  | BioLegend                               | 127608         | 100                              |
| CD41                                       | PB           | MWReg30         | AB_2750526  | BioLegend                               | 133932         | 100                              |
| CSF1R                                      | APC          | AFS98           | AB_1210789  | eBioscience                             | 17-1152-82     | 100                              |
| SCA1/Ly-6A/E                               | PE           | D7              | AB_466085   | Thermo Fisher Scientific                | 12-5981-81     | 100                              |
| KIT/CD117                                  | APC          | 2B8             | AB_469429   | Thermo Fisher Scientific                | 17-1171-81     | 100                              |
| CD3                                        | PB           | 17A2            | AB_493645   | BioLegend                               | 100214         | 100                              |
| TER-119                                    | PB           | TER-119         | AB_2251160  | BioLegend                               | 116232         | 100                              |
| Ly6C                                       | PB           | HK1.4           | AB_1732079  | BioLegend                               | 128014         | 100                              |
| B220                                       | PB           | RA3-6B2         | AB_492876   | BioLegend                               | 103227         | 100                              |
| Progranulin                                | unconjugated | N/A             | AB_2114504  | R&D Systems                             | AF2557-SP      | 1000                             |
| GFP                                        | unconjugated | N/A             | AB_221569   | Thermo Fisher Scientific                | A-11122        | 1000                             |
| Alpha tubulin                              | unconjugated | DM1A            | AB_477583   | Sigma-Aldrich                           | T6199          | 5000                             |
| Cathepsin D                                | unconjugated | AF1029          | AB_2087094  | R&D Systems                             | AF1029         | 1000                             |
| Ubiquitin                                  | unconjugated | N/A             | AB_1088148  | Thermo Fisher Scientific                | PA1-10023      | 1000                             |
| IBA1                                       | unconjugated | N/A             | AB_8395040  | FUJIFILM Wako Pure Chemical Corporation | 19-19741       | 100                              |
| F4/80                                      | unconjugated | BM8.1           | AB_2938669  | Cell Signaling Technology               | 71299S         | 100                              |
| TotalSeq™-B 0301 Hashtag 1 (CD45 and MHC1) | oligo-tagged | 30F11 and M1/42 | AB_2814067  | BioLegend                               | 155831         | 0.15 µL/ 1x10 <sup>6</sup> cells |
| TotalSeq™-B 0302 Hashtag 2 (CD45 and MHC1) | oligo-tagged | 30F11 and M1/42 | AB_2814068  | BioLegend                               | 155833         | 0.15 µL/ 1x10 <sup>6</sup> cells |
| TotalSeq™-B 0303 Hashtag 3 (CD45 and MHC1) | oligo-tagged | 30F11 and M1/42 | AB_2814069  | BioLegend                               | 155835         | 0.15 µL/ 1x10 <sup>6</sup> cells |
